# Supplementary material for: Heterometallic uranium/molybdenum nitride synthesis via partial N-atom transfer
Source: Royal Society of Chemistry journal article supplement (doi:10.1039/d2cc00473a), 2022-01-01
Supplement: d2cc00473a1.pdf [file d2cc00473a1.pdf]

## Electronic Supplementary Information (ESI)

### Heterometallic uranium/molybdenum nitride synthesis via partial N-atom transfer

Luciano Barluzzi,<sup>‡[a]</sup> Nadir Jori,<sup>‡[a]</sup> Tianyi He<sup>[c]</sup>, Thayalan Rajeshkumar,<sup>[b]</sup> Rosario Scopelliti,<sup>[a]</sup> Laurent Maron,<sup>\*[b]</sup> Paul Oyala<sup>[c]</sup>, Theodor Agapie,<sup>\*[c]</sup> and Marinella Mazzanti <sup>\*[a]</sup>

*[a] Dr Luciano Barluzzi, Nadir Jori, Dr Rosario Scopelliti, Prof. Marinella Mazzanti  
Group of Coordination Chemistry, Institut des Sciences et Ingénierie Chimiques, Ecole Polytechnique Fédérale de  
Lausanne (EPFL), 1015 Lausanne, Switzerland  
E-mail: marinella.mazzanti@epfl.ch*

*[b] Thayalan Rajeshkumar, Prof. Laurent Maron  
Laboratoire de Physique et Chimie des Nano-objets, Institut National des Sciences Appliquées, 31077 Toulouse,  
Cedex 4, France;*

*[c] Prof. Theodor Agapie, Tianyi He  
Division of Chemistry and Chemical Engineering, California Institute of Technology, Pasadena, California 91125,  
United States*

## TABLE OF CONTENTS

|                                |           |
|--------------------------------|-----------|
| <b>Experimental Procedures</b> | <b>3</b>  |
| <b>NMR spectra</b>             | <b>6</b>  |
| <b>XRD data</b>                | <b>19</b> |
| <b>EPR data</b>                | <b>21</b> |
| <b>Computational details</b>   | <b>26</b> |
| <b>References</b>              | <b>42</b> |

## Experimental Procedures

**General Considerations.** Unless otherwise noted, all manipulations were carried out at ambient temperature under an inert dinitrogen atmosphere using Schlenk techniques and an MBraun glovebox equipped with a purifier unit. The water and oxygen levels were always kept at less than 0.1 ppm. Glassware was dried overnight at 140°C before use.

**NMR experiments** were carried out using NMR tubes adapted with J-Young valves. NMR spectra were recorded on a Bruker 400 MHz or 600 MHz spectrometers. NMR chemical shifts are reported in ppm with solvent as internal reference.

**Elemental analyses** were performed under nitrogen using a Thermo Scientific Flash 2000 Organic Elemental Analyzer at the Institute of Chemistry and Chemical Engineering at EPFL.

**Starting materials** Unless otherwise noted, reagents were purchased from commercial suppliers and used without further purification. Tris(tert-butoxy)silanol was purified by sublimation. Anhydrous solvents were purchased from Aldrich and further distilled from K/benzophenone (thf, hexane). Deuterated solvents for NMR spectroscopy ( $d_8$ -thf,  $d_8$ -toluene) were purchased from Cortecnet, freeze-degassed and distilled over K/benzophenone.  $d_6$ -DMSO was freeze-degassed and dried over 3 Å molecular sieves for several days.  $^{13}\text{C}$ O (93.13%  $^{13}\text{C}$ ) was purchased from Cortecnet and transferred to a flask equipped with a J-Young valve containing activated 3 Å molecular sieves prior to use.

Precise amounts of labelled gases are added to reaction flasks or NMR tubes equipped with a J-Young valve using a short connector of known volume adapted on a Schlenk line equipped with a pressure sensor. Depleted uranium was purchased from Ibilabs, Florida, USA,  $[\text{U}^{\text{III}}(\text{OSi}(\text{O}^t\text{Bu})_3)_2]$  <sup>1</sup> (used as source of the monomeric complex  $[\text{U}(\text{OSi}(\text{O}^t\text{Bu})_3)_3(\text{thf})_2]$ ),  $[\text{Cl}(\text{N})\text{Mo}^{\text{IV}}\text{P}_2]$  <sup>2</sup> and  $[\text{P}_2\text{Mo}^{\text{II}}(\text{N})\text{Na}]$  <sup>3</sup> were prepared according to the published procedure.

Caution: Depleted uranium (primary isotope  $^{238}\text{U}$ ) is a weak  $\alpha$ -emitter (4.197 MeV) with a half-life of  $4.47 \times 10^9$  years. Manipulations and reactions should be carried out in monitored fume hoods or in an inert atmosphere glovebox in a radiation laboratory equipped with  $\alpha$ - and  $\beta$ -counting equipment.

**Synthesis of  $[\text{Na}\{\text{U}(\text{OSi}(\text{O}^t\text{Bu})_3)_3(\mu\text{-N})(\text{MoP}_2)\}]$ , **1**.** A cold (-40°C) brown-red solution of  $[\text{U}^{\text{III}}(\text{OSi}(\text{O}^t\text{Bu})_3)_2]$  (53.9 mg, 0.0262 mmol, 1 equiv) in thf (3.0 mL) was added to a cold (-40°C) orange-red solution of  $[\text{P}_2\text{Mo}^{\text{II}}(\text{N})\text{Na}]$  (30.9 mg, 0.0524 mmol, 2 equiv) in thf (3.0 mL) and stirred at -40°C. The colour of the reaction mixture changed rapidly from dark red to dark brown. The  $^1\text{H}$  NMR spectrum of the reaction mixture measured immediately after the addition showed the presence of  $[\text{U}^{\text{IV}}(\text{OSi}(\text{O}^t\text{Bu})_3)_4]$  and complex **1**. (Figure S1) The  $^{31}\text{P}\{^1\text{H}\}$  NMR of the reaction mixture showed only traces of  $[\text{P}_2\text{MoNNa}]$  (Figure S2).  $^{31}\text{P}\{^1\text{H}\}$  NMR studies revealed that the reaction is complete after 3 hs stirring.

The reaction mixture was filtered and all volatiles were removed under vacuum. The resultant solid was dissolved in hexane (0.4 mL) and stored at -40°C affording after 15 hs large dark brown crystals of complex **1** in 72% yield (58.0 mg, 0.0381 mmol). Anal. Calcd. for  $[\text{Na}\{\text{U}(\text{OSi}(\text{O}^t\text{Bu})_3)_3(\mu\text{-N})(\text{MoP}_2)\}](\text{C}_6\text{H}_{14})_{0.1}$ : C: 49.12%, H: 7.33%, N: 0.86%. Found: C:49.45%, H: 7.43%, N:0.96%.

Complex **1** shows moderate stability at room temperature both in solid state and in a thf solution, fully decomposing to an intractable mixture of unidentified species over the course of 12 hours. Decomposition is significantly slower at -40°C in thf solution and the solid can be stored at -40°C in the solid state at least up to a month.

$^1\text{H}$  NMR ( $d_8$ -thf, 400 MHz, 233 K):  $\delta$  = 10.5 ppm (br), -10.5 ppm (br). (Figure S3)

$^1\text{H}$  NMR ( $d_8$ -thf, 400 MHz, 298 K):  $\delta$  = 12.7 ppm (br), 8.7 ppm (br), 0.42 ppm (s), -0.61 ppm (s), -2.4 ppm (br). (Figure S4)

$^{31}\text{P}\{^1\text{H}\}$  NMR ( $d_8$ -thf, 162 MHz, 233 K): Silent

$^{31}\text{P}\{^1\text{H}\}$  NMR ( $d_8$ -thf, 162 MHz, 298 K): Silent

$^1\text{H}$  NMR studies in  $d_8$ -thf showed full decomposition of **1** over the course of 12 hs at room temperature to yield  $[\text{U}^{\text{IV}}\{\text{OSi}(\text{O}^t\text{Bu})_3\}_4]$  and multiple unidentified species. (Figure S5)

$^1\text{H}$  NMR studies in  $d_8$ -thf showed only a traces decomposition of **1** over the course of 5 days at  $-40^\circ\text{C}$  (Figure S6).

$^{31}\text{P}$  NMR studies in  $d_8$ -thf showed the appearance of a new resonance at  $\delta = -19.3$  ppm after 5 days at  $-40^\circ\text{C}$  (Figure S7).

**Reaction of 1 equiv. of  $[\text{P}2\text{Mo}^{\text{II}}(\text{N})\text{Na}]$  with 1 equiv of  $[\text{U}^{\text{III}}(\text{OSi}(\text{O}^t\text{Bu})_3)_2]$  at  $-40^\circ\text{C}$ .** A cold ( $-40^\circ\text{C}$ ) red-brown solution of  $[\text{U}^{\text{III}}(\text{OSi}(\text{O}^t\text{Bu})_3)_2]$  (11.3 mg, 0.0053 mmol, 1 equiv) in  $d_8$ -thf (0.3 mL) was added to a cold ( $-40^\circ\text{C}$ ) orange-red solution of  $[\text{P}2\text{Mo}^{\text{II}}(\text{N})\text{Na}]$  (3.2 mg, 0.0052 mmol, 1 equiv) in  $d_8$ -thf (0.2 mL). The reaction mixture was stirred at  $-40^\circ\text{C}$  for 3 days.  $^1\text{H}$  NMR studies show that the reaction only leads to the formation of complex **1** and unreacted  $[\text{U}^{\text{III}}(\text{OSi}(\text{O}^t\text{Bu})_3)(\text{thf})_2]$  (Figure S8). The  $^{31}\text{P}\{^1\text{H}\}$  NMR spectrum of the reaction mixture shows the appearance of two new resonances at  $\delta = 75.3$  ppm, and  $-7.1$  ppm over the course of 3 days that were assigned to decomposition products (Figure S9).

The reaction mixture was filtered and all volatiles were removed under vacuum. The resultant solid was dissolved in hexane (0.2 mL) and stored at  $-40^\circ\text{C}$  affording after 15 hs large dark brown crystals of complex **1**.

**Reaction of 1 equiv. of  $[\text{P}2\text{Mo}^{\text{II}}(\text{N})\text{Na}]$  with 1 equiv of  $[\text{U}^{\text{III}}(\text{OSi}(\text{O}^t\text{Bu})_3)_2]$  at room temperature.** A red-brown solution of  $[\text{U}^{\text{III}}(\text{OSi}(\text{O}^t\text{Bu})_3)_2]$  (20.7 mg, 0.010 mmol, 1 equiv) in  $d_8$ -thf (0.3 mL) was added to an orange-red solution of  $[\text{P}2\text{Mo}^{\text{II}}(\text{N})\text{Na}]$  (5.9 mg, 0.010 mmol, 1 equiv) in  $d_8$ -thf (0.2 mL) and the reaction mixture was stirred at  $25^\circ\text{C}$ .  $^1\text{H}$  NMR studies revealed the disappearance of the starting materials after 1 h and the formation of  $[\text{U}^{\text{IV}}(\text{OSi}(\text{O}^t\text{Bu})_3)_4]$  as a major product (Figure S10). The  $^{31}\text{P}\{^1\text{H}\}$  NMR spectrum of the reaction mixture showed the appearance of three resonances at  $\delta = 75.0$  ppm, 47.9 ppm and  $-7.3$  ppm over the course of 30 min and their disappearance after 1 h, affording three new resonances at  $\delta = 77.9$  ppm, 76.3 ppm and  $-4.3$  ppm (Figure S11)

**Reaction of  $[\text{Na}\{\text{U}(\text{OSi}(\text{O}^t\text{Bu})_3(\mu\text{-N})(\text{MoP}2))\}]$ , **1** with 1 equiv. of  $^{13}\text{CO}$ .**  $[\text{Na}\{\text{U}(\text{OSi}(\text{O}^t\text{Bu})_3(\mu\text{-N})(\text{MoP}2))\}]$ , complex **1** (9.1 mg, 0.0060 mmol, 1 equiv) was dissolved in 0.5 mL of  $d_8$ -thf and the solution was transferred in an NMR tube. The tube was connected to a Schlenk line and the solution was degassed by three cycles of freeze-pump-thawing. 1 equiv of  $^{13}\text{CO}$  was added to the frozen solution. The reaction mixture immediately changed colour from dark brown to dark orange. Multinuclear NMR spectroscopy of the reaction mixture revealed the immediate consumption of the starting material and the formation of a mixture of species (Figures S12-S14) including the previously reported  $[\text{P}2\text{Mo}^{13}\text{CO}]$  complex **3** and  $\text{NaN}^{13}\text{CO}$ . Volatiles were removed and 0.5 mL of  $\text{D}_2\text{O}$  (pD=13) were added to the solid together with few drops of  $d_6$ -DMSO affording an orange solution. The  $^{13}\text{C}$  NMR spectrum of the reaction mixture revealed the formation of  $\text{N}^{13}\text{CO}^-$  in 10% yield. No peak attributable to  $[\text{P}2\text{Mo}^{13}\text{CO}]$  was observed, consistently with its insolubility in water.  $^{13}\text{C}$ -labelled sodium acetate was used as internal standard for quantification (Figure S15)

**Reaction of  $[\text{Na}\{\text{U}(\text{OSi}(\text{O}^t\text{Bu})_3(\mu\text{-N})(\text{MoP}2))\}]$ , **1** with excess  $^{13}\text{CO}$ .**  $[\text{Na}\{\text{U}(\text{OSi}(\text{O}^t\text{Bu})_3(\mu\text{-N})(\text{MoP}2))\}]$  (5 mg, 0.033 mmol, 1 equiv) was dissolved in 0.5 mL of  $d_8$ -thf and the solution was transferred in an NMR tube. The tube was connected to a Schlenk line and the solution was degassed by three cycles of freeze-pump-thawing. 1 atm of  $^{13}\text{CO}$  was added to the tube. The reaction mixture immediately changed colour from red-brown to light green. Multinuclear NMR spectroscopy of the reaction mixture revealed the formation of a mixture of species (Figures S16-S18). Volatiles were removed and 0.5 mL of  $\text{D}_2\text{O}$  (pD=13) were added to the light green solid together with few drops of  $d_6$ -DMSO affording a light green solution. The  $^{13}\text{C}$  NMR spectrum of the reaction mixture revealed the formation of  $\text{N}^{13}\text{CO}^-$ . (Figure S19)

**Reaction of  $[\text{Na}\{\text{U}(\text{OSi}(\text{O}^t\text{Bu})_3(\mu\text{-N})(\text{MoP2})\}_2]$ , **1** with 10 equiv. of  $^{13}\text{CO}$ .**  $[\text{Na}\{\text{U}(\text{OSi}(\text{O}^t\text{Bu})_3(\mu\text{-N})(\text{MoP2})\}_2]$ , complex **1** (5.0 mg, 0.0033 mmol, 1 equiv) was dissolved in 0.5 mL of  $d_8$ -thf and the solution was transferred in an NMR tube. The tube was connected to a Schlenk line and the solution was degassed by three cycles of freeze-pump-thawing. 1 equiv of  $^{13}\text{CO}$  was added to the frozen solution. The reaction mixture immediately changed colour from dark brown to dark green. Multinuclear NMR spectroscopy of the reaction mixture revealed the immediate consumption of the starting material and the formation of a mixture of species (Figures S20-S22). The reaction mixture was left to evolve at  $-40^\circ\text{C}$  for 24 hs and warmed up to  $25^\circ\text{C}$  for other 24 hs. Multinuclear NMR spectroscopy of the reaction mixture revealed the formation of the previously reported  $[\text{P2Mo}(^{13}\text{CO})_3]$  complex **3** (Figures S23-S25). Volatiles were removed and 0.5 mL of  $\text{D}_2\text{O}$  (pD=13) were added to the solid together with few drops of  $d_6$ -DMSO affording an green solution. The  $^{13}\text{C}$  NMR spectrum of the reaction mixture revealed the formation of  $\text{N}^{13}\text{CO}^-$  in 50% yield. No peak attributable to  $[\text{P2Mo}(^{13}\text{CO})_3]$  was observed, consistently with its insolubility in water. **3**  $^{13}\text{C}$ -labelled sodium acetate was used as internal standard for quantification (Figure S26)

**Reaction of 2 equiv. of  $[\text{Cl}(\text{N})\text{Mo}^{\text{IV}}\text{P2}]$  with 1 equiv of  $[\text{U}^{\text{III}}(\text{OSi}(\text{O}^t\text{Bu})_3)_2]$  at  $-40^\circ\text{C}$  and warmed up at room temperature.** A cold ( $-40^\circ\text{C}$ ) pink solution of  $[\text{Cl}(\text{N})\text{Mo}^{\text{IV}}\text{P2}]$  (10.4 mg, 0.017 mmol, 2 equiv) in 0.3 mL of  $d_8$ -thf was added to a cold ( $-40^\circ\text{C}$ ) red-brown solution of  $[\text{U}(\text{OSi}(\text{O}^t\text{Bu})_3)_2]$  (17.7 mg, 0.0086 mmol, 1 equiv) in 0.3 mL of  $d_8$ -thf. The reaction mixture was monitored by  $^1\text{H}$  NMR spectroscopy and no reaction was observed after 24h at  $-40^\circ\text{C}$  (Figure S27). The reaction mixture was warmed to  $25^\circ\text{C}$  but no reaction was observed after 24h. The reaction with 1 equiv of  $[\text{Cl}(\text{N})\text{Mo}^{\text{IV}}\text{P2}]$  also resulted in no reaction.

## NMR spectra

**Figure S1.**  $^1\text{H}$  NMR spectrum (400 MHz,  $d_8$ -thf, 233K) of the evolution of the reaction mixture of 2 equiv. of  $[\text{P2MoNNa}]$ , a) before addition and b) after addition of 1 equiv. of  $[\text{U}(\text{OSi}(\text{O}^i\text{Bu})_3)_2]$  at  $-40^\circ\text{C}$ .

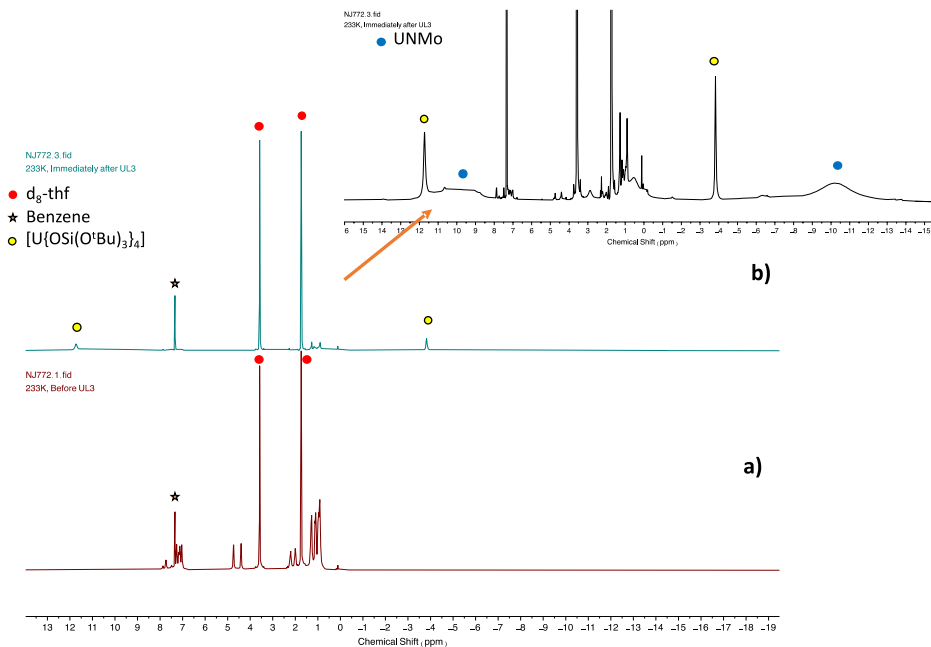

**Figure S2.**  $^{31}\text{P}\{^1\text{H}\}$  NMR spectra (162 MHz,  $d_8$ -thf, 233K) of the evolution of the reaction mixture of 2 equiv. of  $[\text{P2MoNNa}]$  a) before addition, b) immediately after addition, and c) 3 hs after addition of 1 equiv. of  $[\text{U}(\text{OSi}(\text{O}^i\text{Bu})_3)_2]$  at  $-40^\circ\text{C}$ .

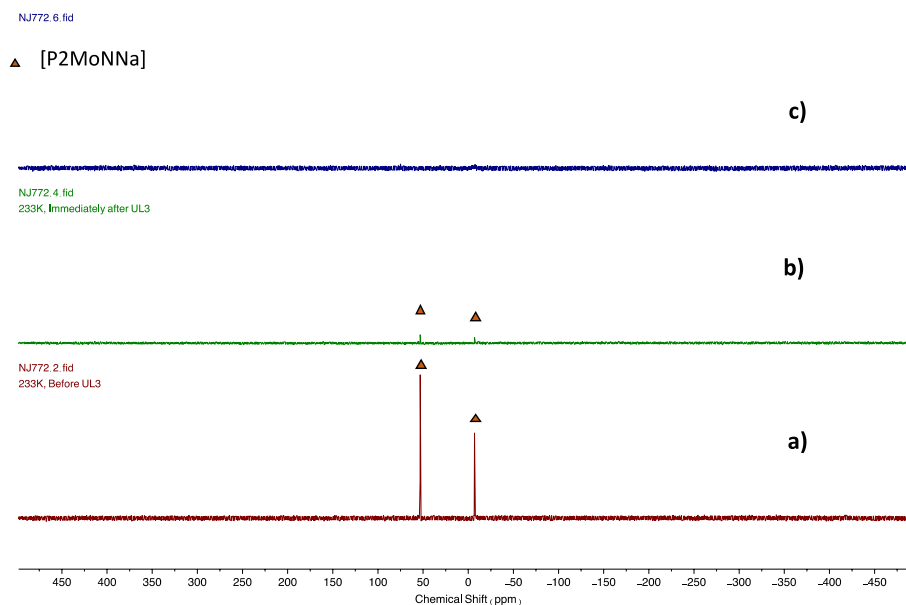

**Figure S3.**  $^1\text{H}$  NMR spectrum (400 MHz,  $d_8$ -thf, 233K) of complex 1.

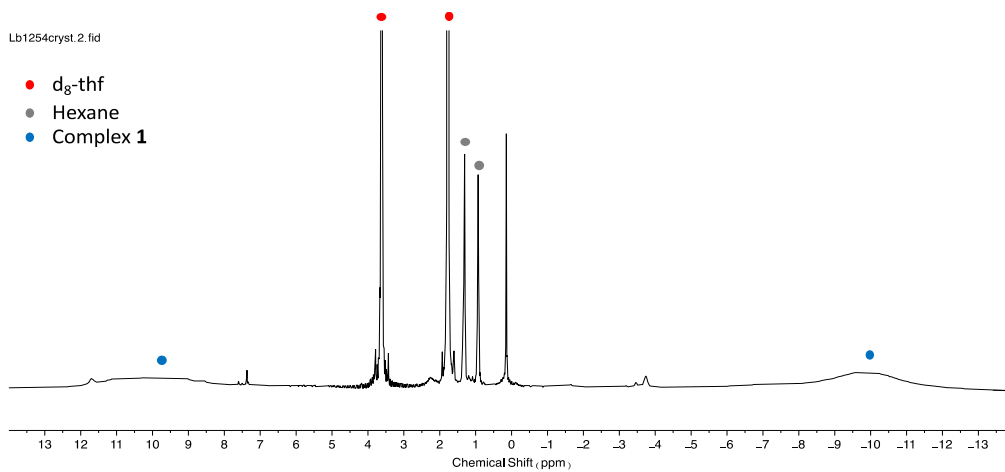

**Figure S4.**  $^1\text{H}$  NMR spectrum (400 MHz,  $d_8$ -thf, 298K) of complex 1.

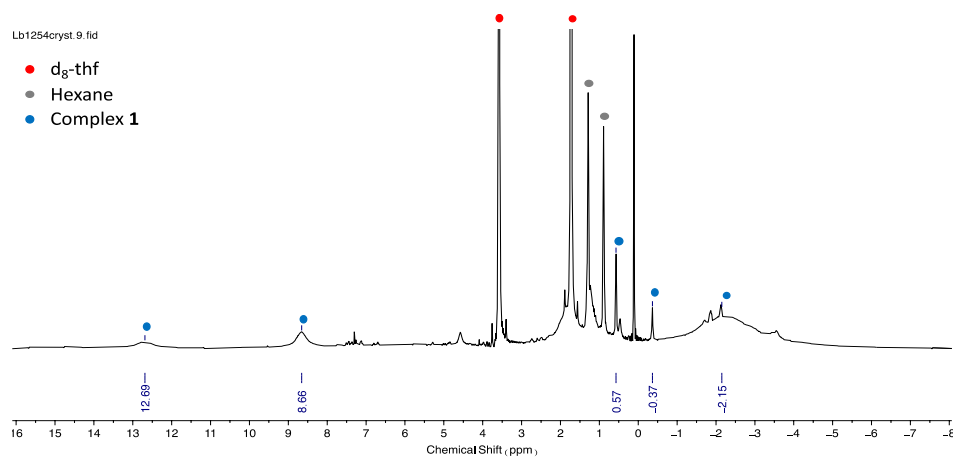

**Figure S5.**  $^1\text{H}$  NMR spectra (400 MHz,  $d_8$ -thf, 298K) of complex **1** at room temperature immediately after dissolving (bottom) and after 12 hs at room temperature (top) showing complete decomposition of **1**.

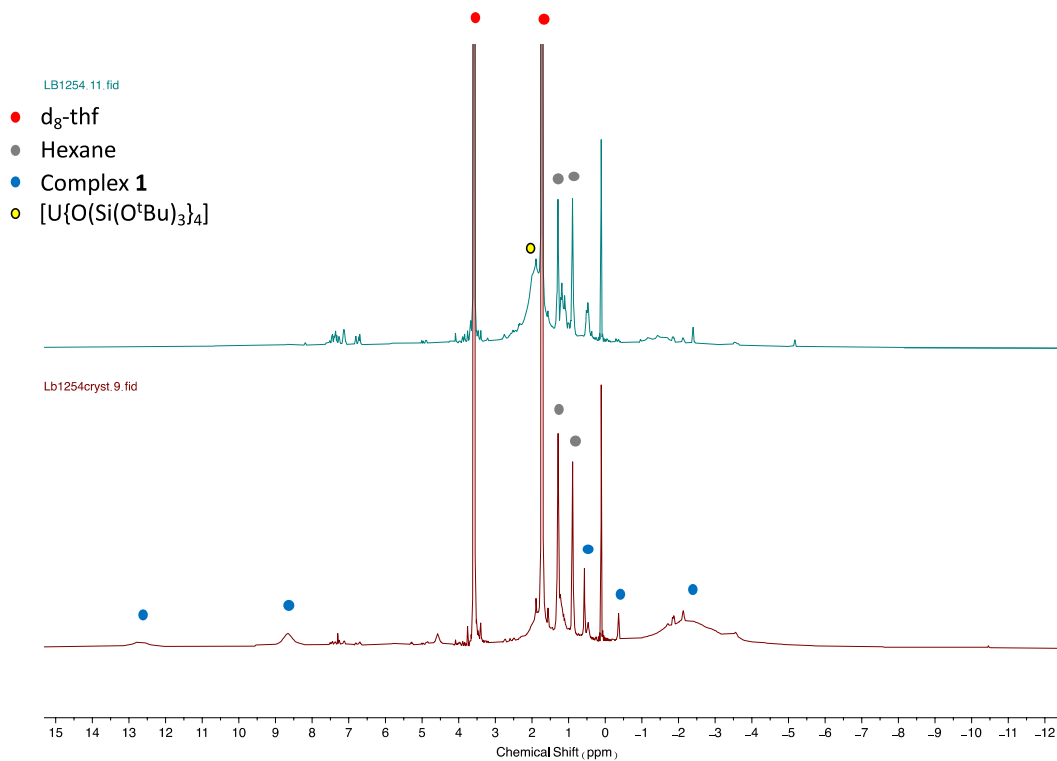

**Figure S6.**  $^1\text{H}$  NMR spectra (400 MHz,  $d_8$ -thf, 233K) of the evolution of a solution of complex **1** in THF at  $-40^\circ\text{C}$  a) immediately b) 24 hs after, c) 48 hs after and d) 5 days after dissolving

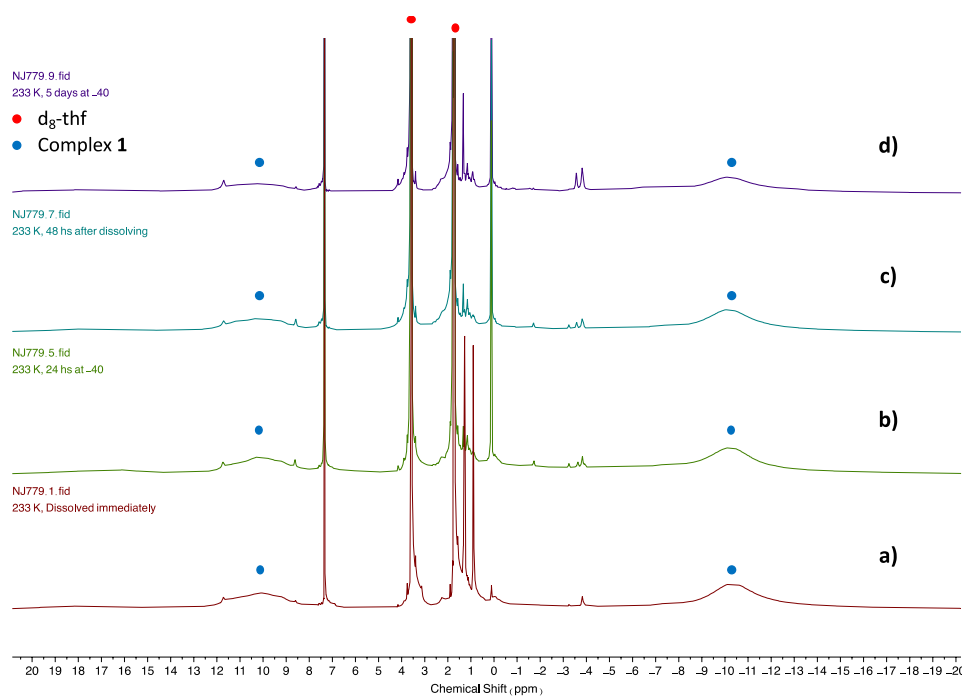



**Figure S7.**  $^{31}\text{P}\{^1\text{H}\}$  NMR spectra (162 MHz,  $d_8$ -thf, 233K) of the evolution of a solution of complex **1** in THF at  $-40^\circ\text{C}$  a) immediately b) 24 hs after, c) 48 hs after and d) 5 days after dissolving

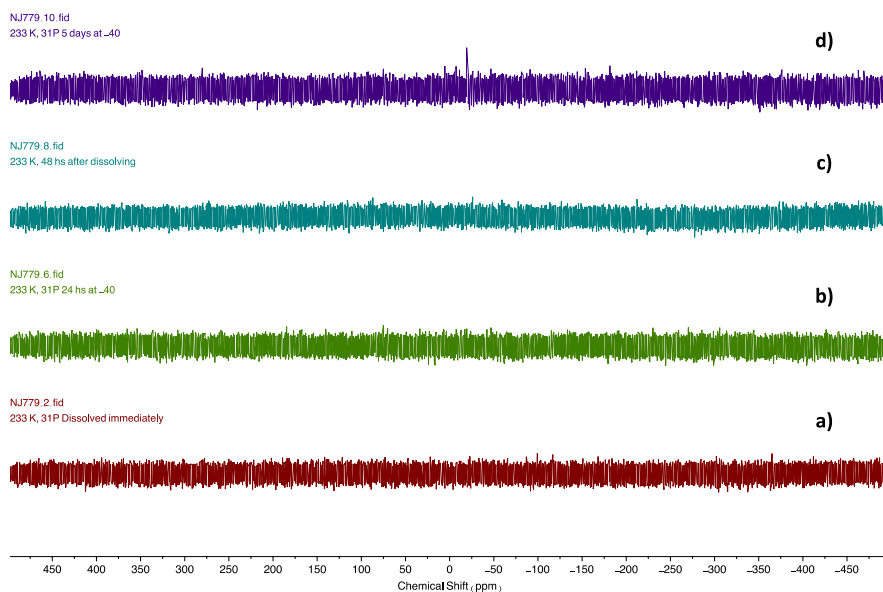

**Figure S8.**  $^1\text{H}$  NMR spectra (400 MHz,  $d_8$ -thf, 233K) of the evolution of the reaction mixture of 1 equiv. of  $[\text{P}2\text{MoNNa}]$  with 1 equiv. of  $[\text{U}(\text{OSi}(\text{O}^t\text{Bu})_3)_2]$  at  $-40^\circ\text{C}$ , a) immediately after addition, b) 3 days after addition.

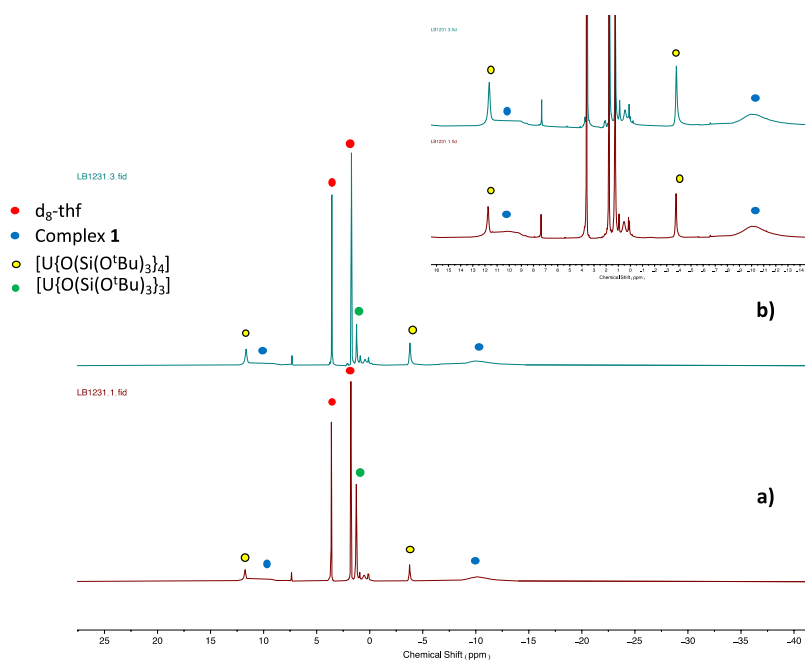

**Figure S9.**  $^{31}\text{P}\{^1\text{H}\}$  NMR spectra (162 MHz,  $d_8$ -thf, 233K) of the evolution of the reaction mixture of 1 equiv. of  $[\text{P2MoNNa}]$  with 1 equiv. of  $[\text{U}(\text{OSi}(\text{O}^t\text{Bu})_3)_3]_2$  at  $-40^\circ\text{C}$ , b) immediately after addition, c) 3 days after addition versus a) pure  $[\text{P2MoNNa}]$ .

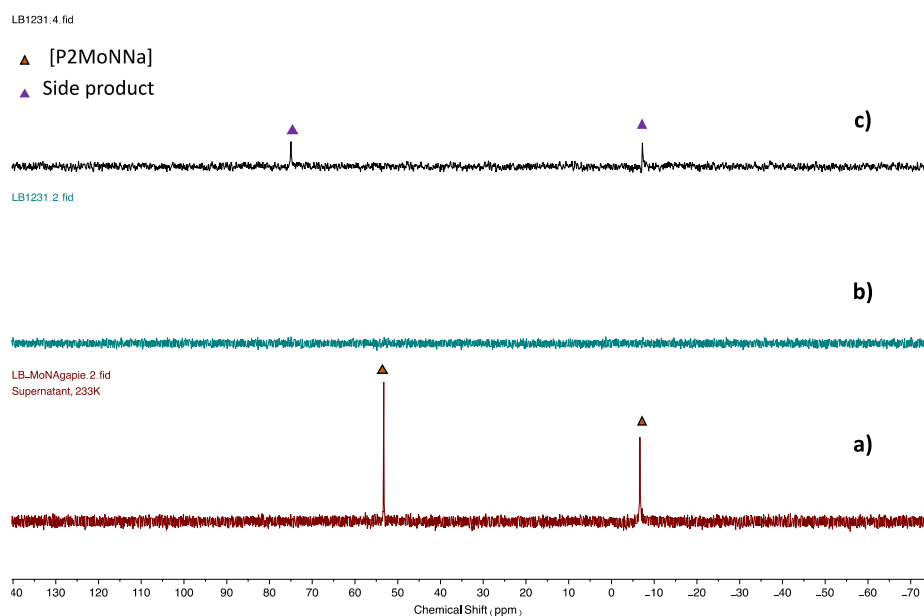

**Figure S10.**  $^1\text{H}$  NMR spectra (400 MHz,  $d_8$ -thf, 298K) of the evolution of the reaction mixture of 1 equiv. of  $[\text{P2MoNNa}]$  with 1 equiv. of  $[\text{U}(\text{OSi}(\text{O}^t\text{Bu})_3)_3]_2$  at room temperature, a) immediately after addition, b) 30 min after addition, c) 1 h after addition.

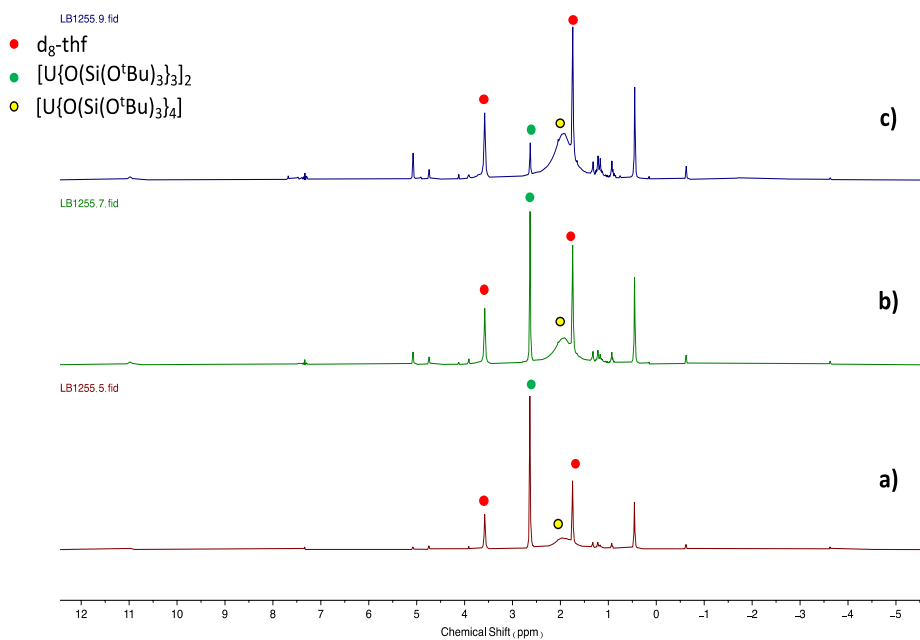

**Figure S11.**  $^{31}\text{P}\{^1\text{H}\}$  NMR spectra (162 MHz,  $d_8$ -thf, 298K) of the evolution of the reaction mixture of 1 equiv. of  $[\text{P}2\text{MoNNa}]$  with 1 equiv. of  $[\text{U}(\text{OSi}(\text{O}^t\text{Bu})_3)_2]$  at room temperature, a) immediately after addition, b) 30 min after addition, c) 1 h after addition.

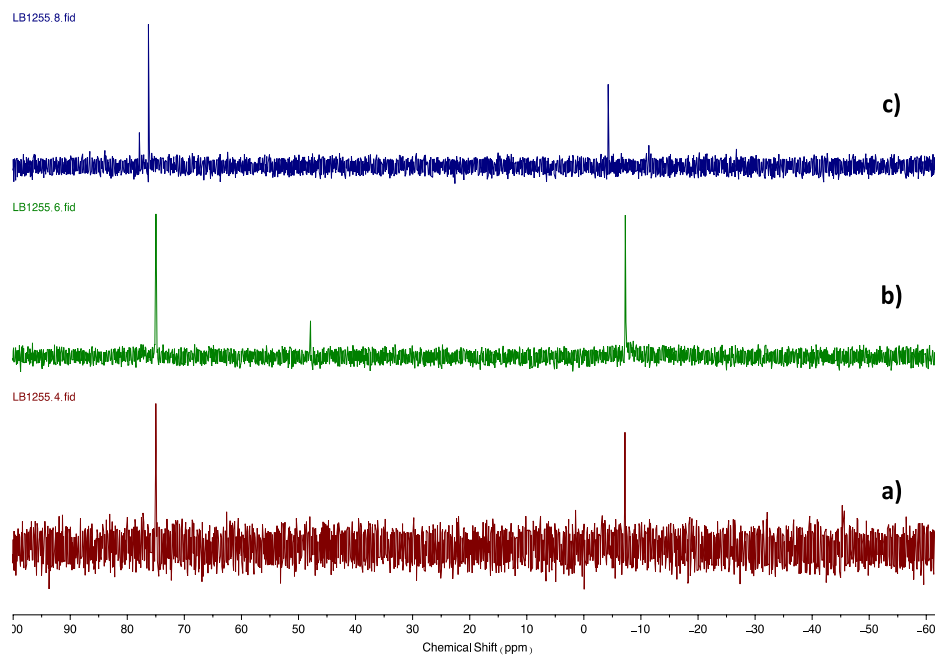

**Figure S12.**  $^1\text{H}$  NMR spectra (400 MHz,  $d_8$ -thf, 233K) of the reaction mixture of complex 1 with 1 equiv of  $^{13}\text{CO}$  a) before and b) immediately after addition.

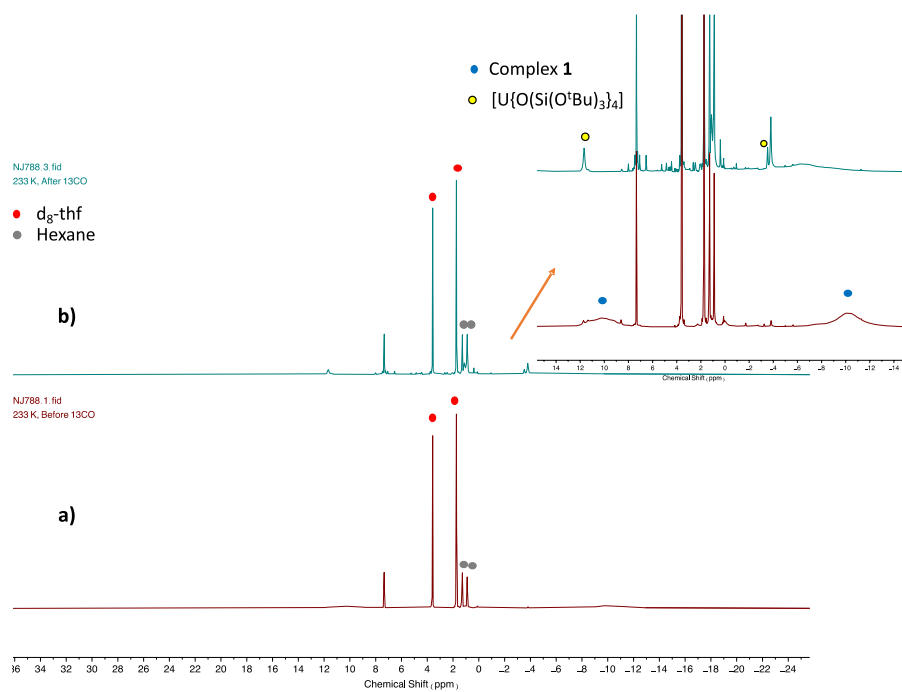

**Figure S13.**  $^{31}\text{P}\{^1\text{H}\}$  NMR (162 MHz,  $d_8$ -thf, 233K) of the reaction mixture of complex **1** with 1 equiv of  $^{13}\text{CO}$  a) before and b) immediately after addition.

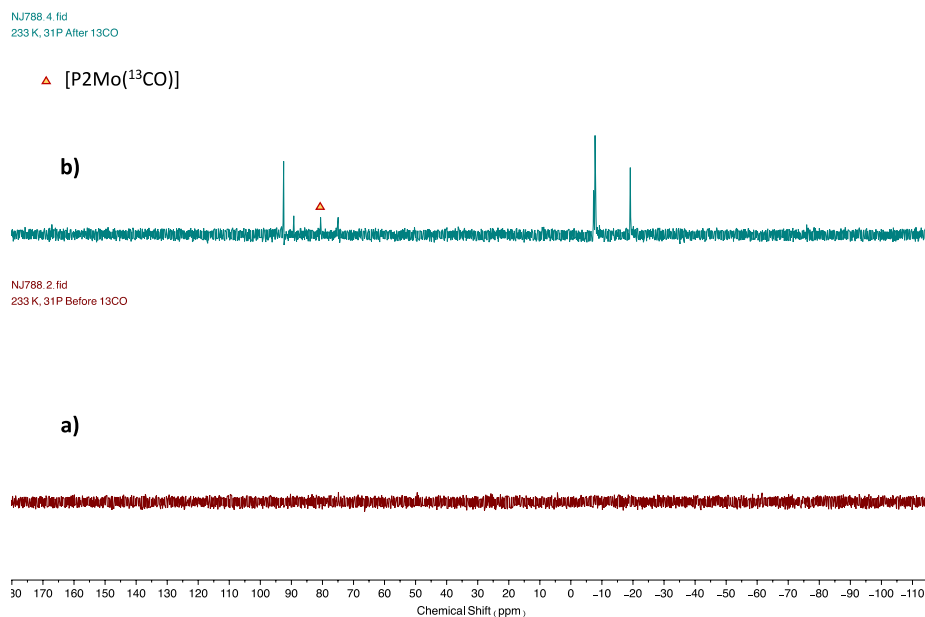

**Figure S14.**  $^{13}\text{C}\{^1\text{H}\}$  NMR spectrum (100 MHz,  $d_8$ -thf, 233K) of the reaction mixture of complex **1** with 1 equiv. of  $^{13}\text{CO}$  immediately after addition.

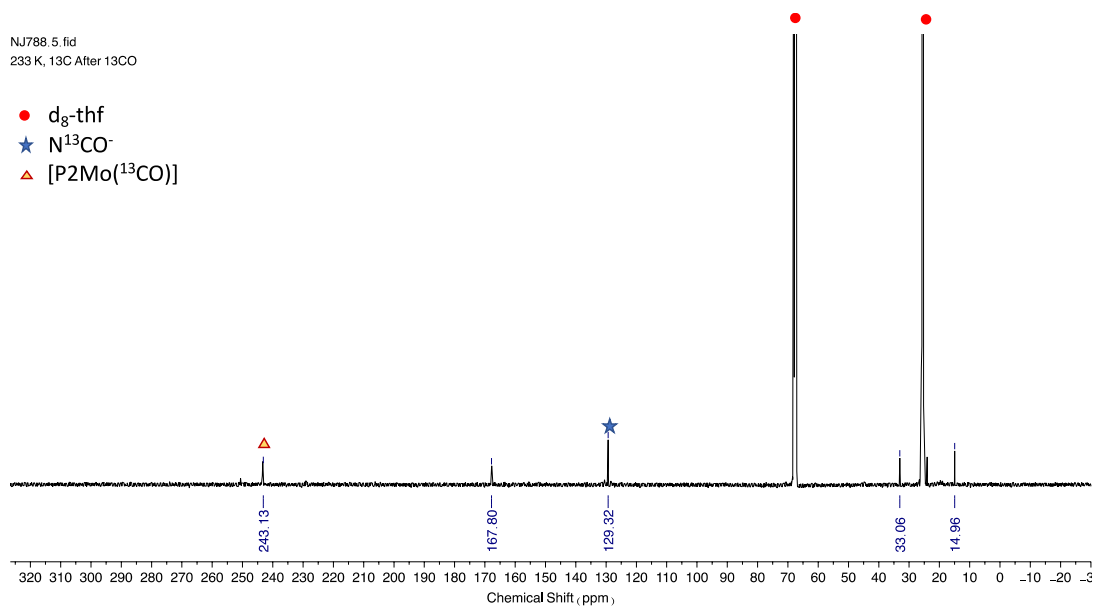

**Figure S15.**  $^{13}\text{C}\{^1\text{H}\}$  NMR spectrum (151 MHz,  $\text{D}_2\text{O}$ , 298K) of the hydrolysis with  $\text{pD}=13$   $\text{D}_2\text{O}$  of the reaction mixture between complex **1** and 1 equiv of  $^{13}\text{CO}$ .

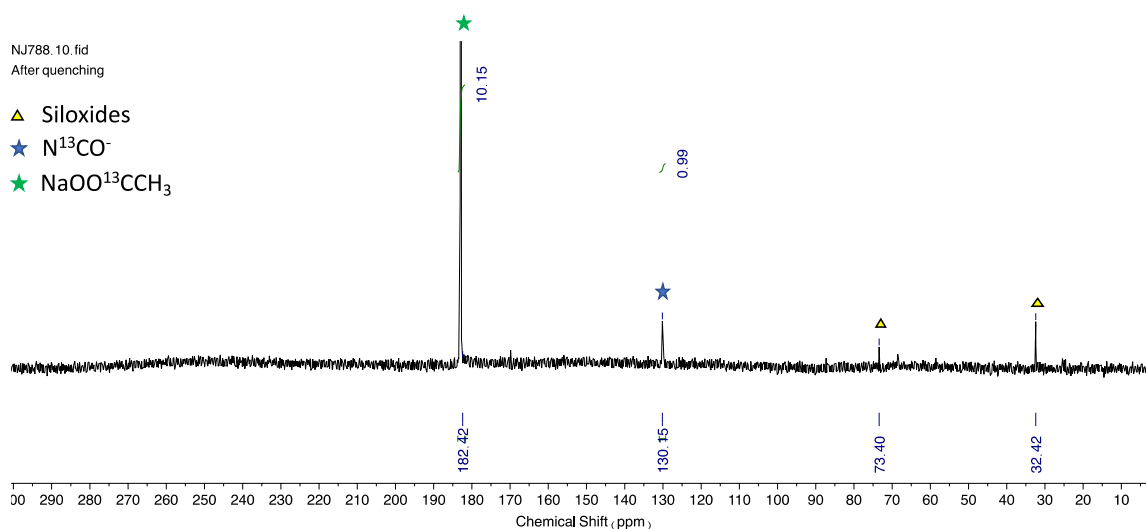

**Figure S16.**  $^1\text{H}$  NMR spectrum (400 MHz,  $\text{d}_8\text{-thf}$ , 298K) of the reaction mixture of complex **1** with 1 atm of  $^{13}\text{CO}$  immediately after addition.

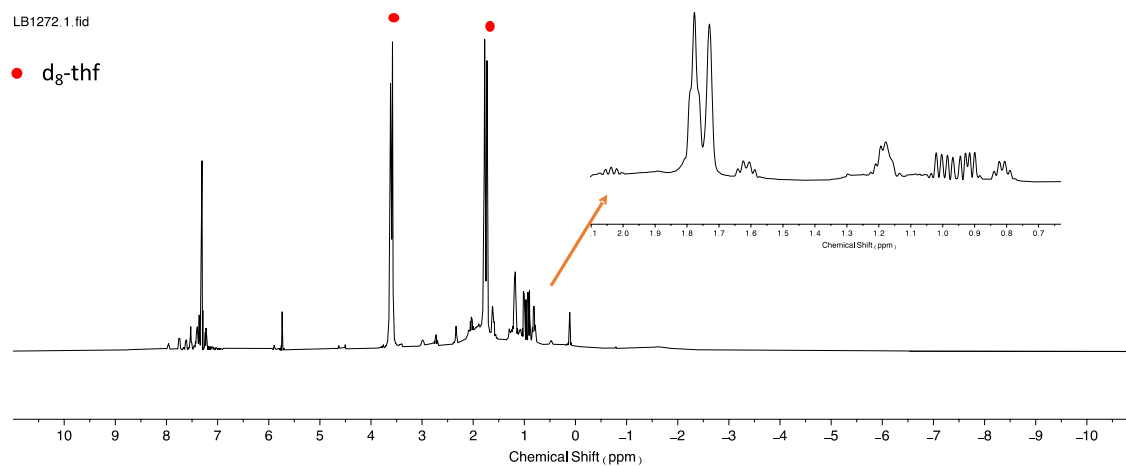

**Figure S17.**  $^{31}\text{P}\{^1\text{H}\}$  NMR spectrum (162 MHz,  $d_8$ -thf, 298K) of the reaction mixture of complex **1** with 1 atm of  $^{13}\text{CO}$  immediately after addition.

LB1272.2.fid

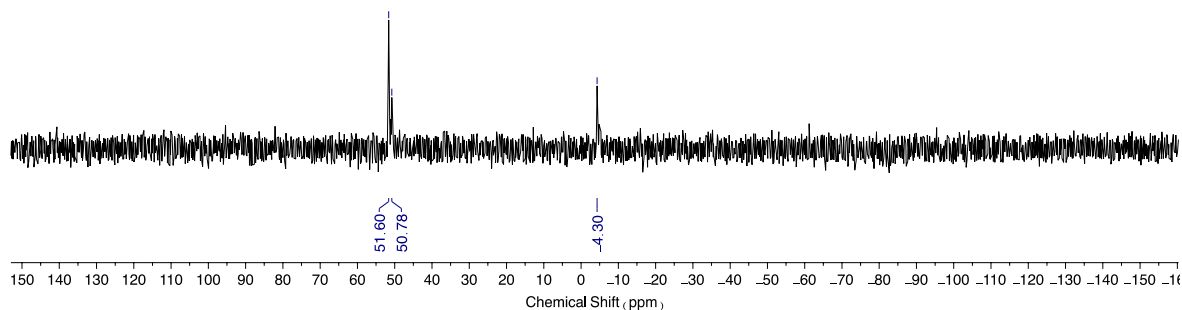

**Figure S18.**  $^{13}\text{C}\{^1\text{H}\}$  NMR spectrum (100 MHz,  $d_8$ -thf, 298K) of the reaction mixture of complex **1** with 1 atm of  $^{13}\text{CO}$  immediately after addition.

LB1272.3.fid

●  $d_8$ -thf  
●  $^{13}\text{CO}$

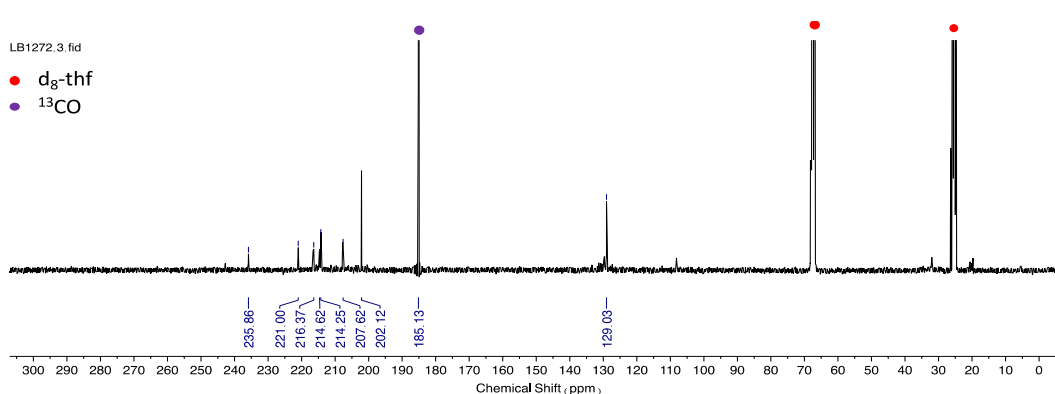

**Figure S19.**  $^{13}\text{C}\{^1\text{H}\}$  NMR spectrum (100 MHz,  $\text{D}_2\text{O}$ , 298K) of the hydrolysis with  $\text{pD}=13$   $\text{D}_2\text{O}$  of the reaction mixture between complex **1** and 1 atm of  $^{13}\text{CO}$ .

LB1272.4.fid

●  $d_6$ -DMSO  
▲ Siloxides  
★  $\text{N}^{13}\text{CO}^-$

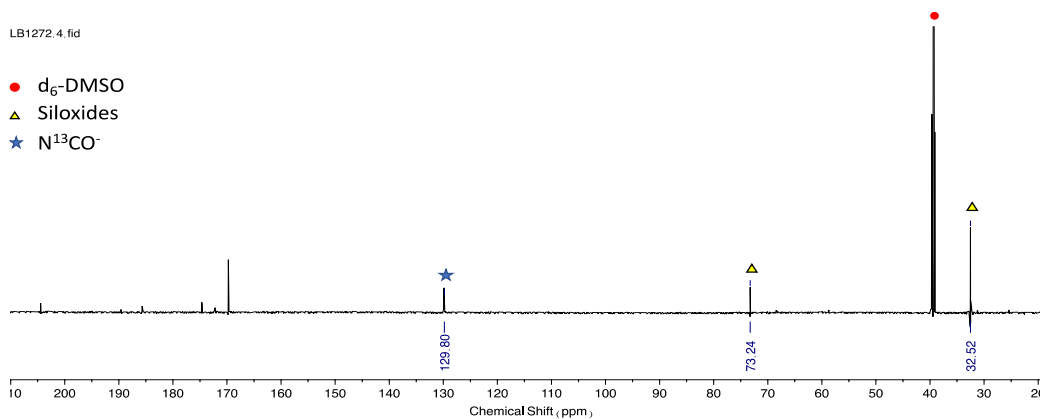

**Figure S20.**  $^1\text{H}$  NMR spectra (400 MHz,  $d_8$ -thf, 233K) of the reaction mixture of complex **1** with 10 equiv of  $^{13}\text{C}$ O before and b) immediately after addition.

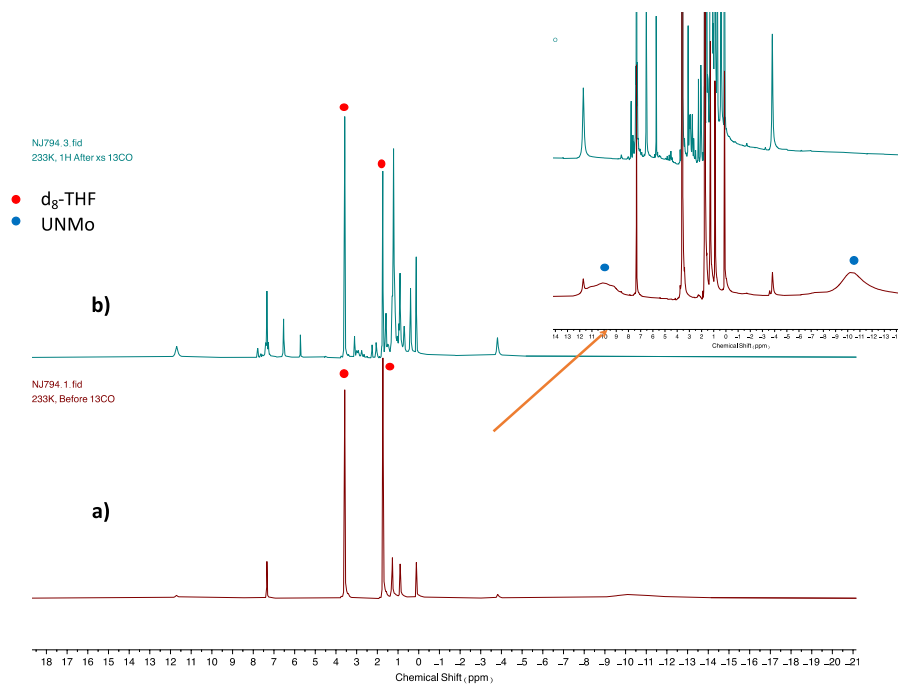

**Figure S21.**  $^{31}\text{P}\{^1\text{H}\}$  NMR (162 MHz,  $d_8$ -thf, 233K) of the reaction mixture of complex **1** with 10 equiv of  $^{13}\text{C}$ O a) before and b) immediately after addition.

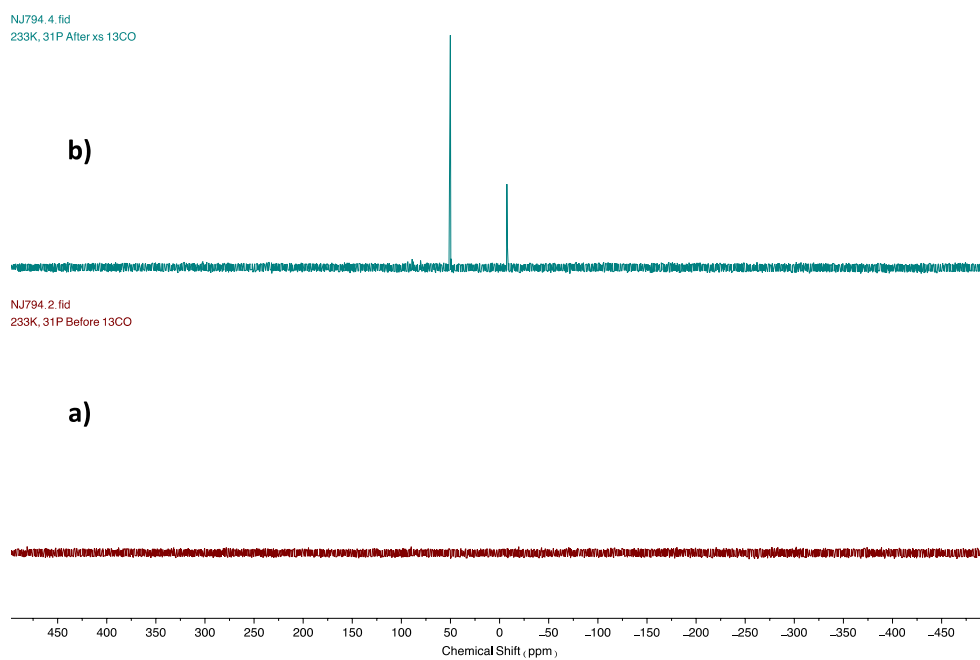

**Figure S22.**  $^{13}\text{C}\{^1\text{H}\}$  NMR spectrum (100 MHz,  $d_8$ -thf, 233K) of the reaction mixture of complex **1** with 10 equiv. of  $^{13}\text{CO}$  immediately after addition.

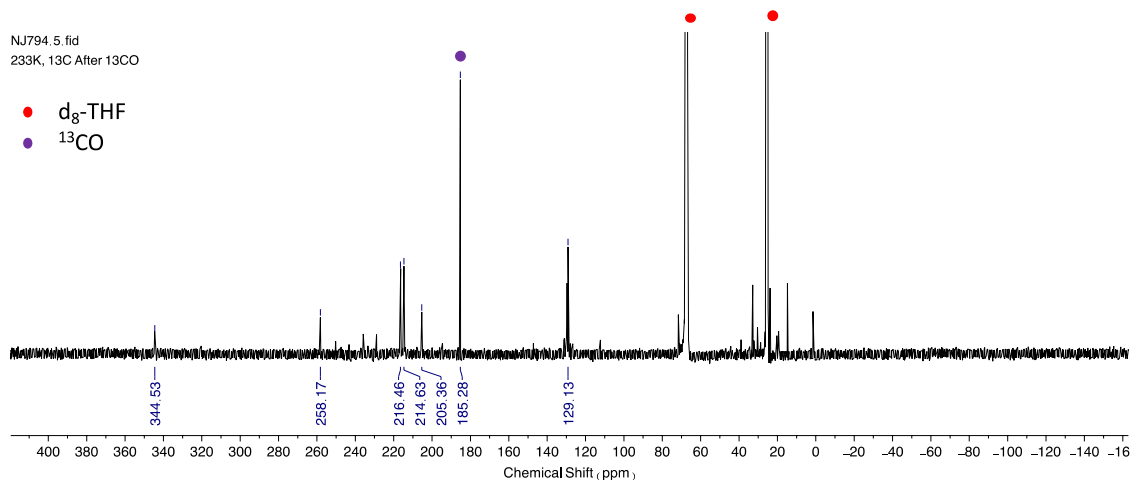

**Figure S23.**  $^1\text{H}$  NMR spectra (400 MHz,  $d_8$ -thf, 298K) of the reaction mixture of complex **1** with 10 equiv of  $^{13}\text{CO}$  a) 24 hs after at  $-40^\circ\text{C}$  and b) 24 hs after warmed up to  $25^\circ\text{C}$ .

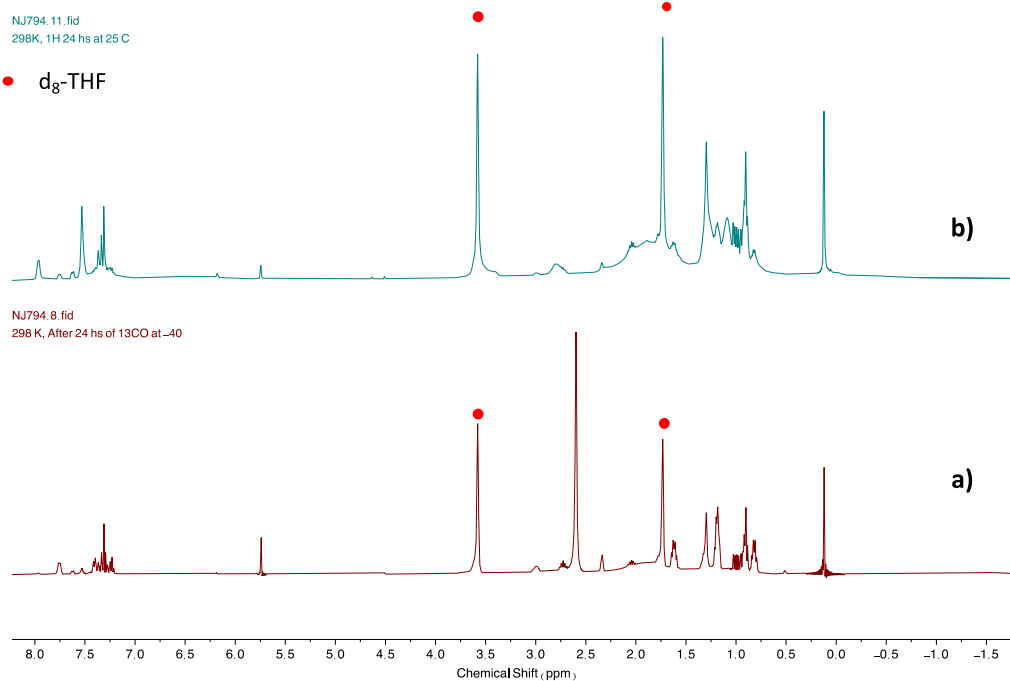



**Figure S24.**  $^{31}\text{P}\{^1\text{H}\}$  NMR (162 MHz,  $d_8$ -thf, 298K) of the reaction mixture of complex **1** with 10 equiv of  $^{13}\text{CO}$  a) 24 hs after at  $-40^\circ\text{C}$  and b) 24 hs after warmed up to  $25^\circ\text{C}$ .

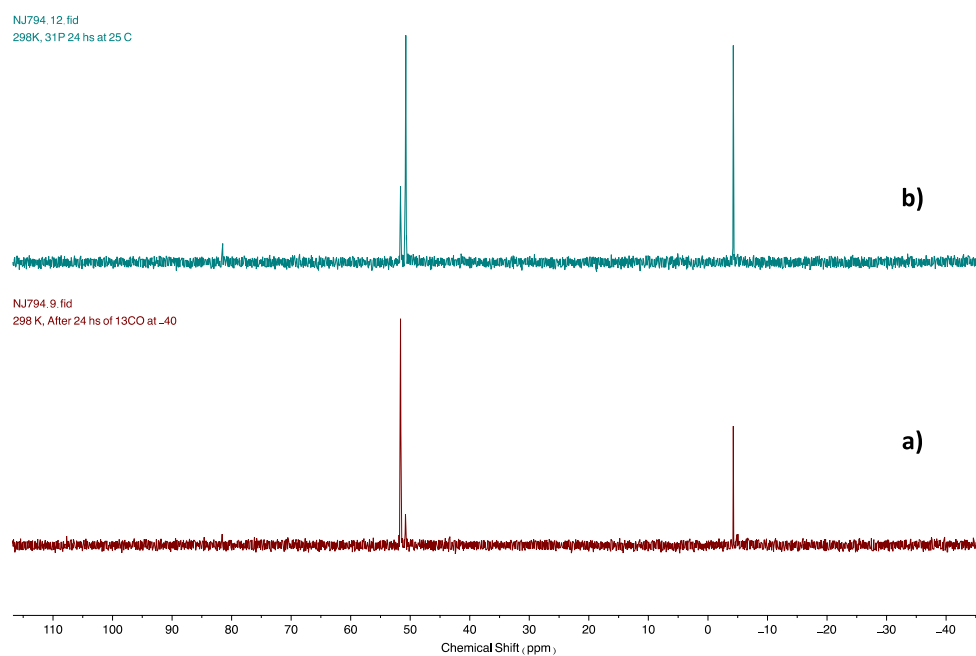

**Figure S25.**  $^{13}\text{C}\{^1\text{H}\}$  NMR (100 MHz,  $d_8$ -thf, 298K) of the reaction mixture of complex **1** with 10 equiv of  $^{13}\text{CO}$  a) 24 hs after at  $-40^\circ\text{C}$  and b) 24 hs after warmed up to  $25^\circ\text{C}$ .

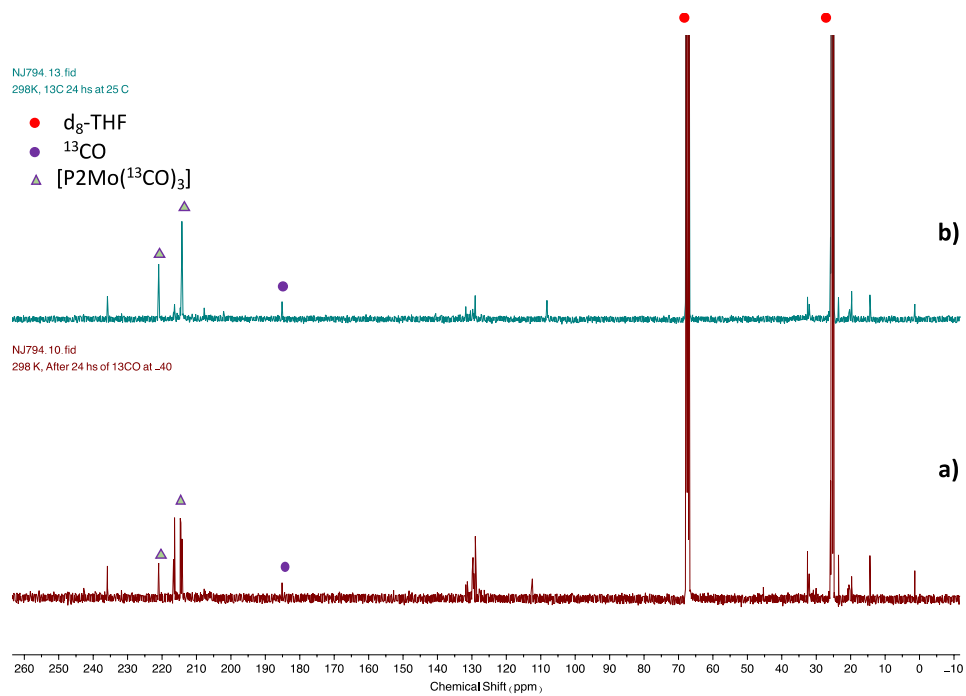

**Figure S26.**  $^{13}\text{C}\{^1\text{H}\}$  NMR spectrum (151 MHz,  $\text{D}_2\text{O}$ , 298K) of the hydrolysis with  $\text{pD}=13$   $\text{D}_2\text{O}$  of the reaction mixture between complex **1** and 10 equiv of  $^{13}\text{CO}$ .

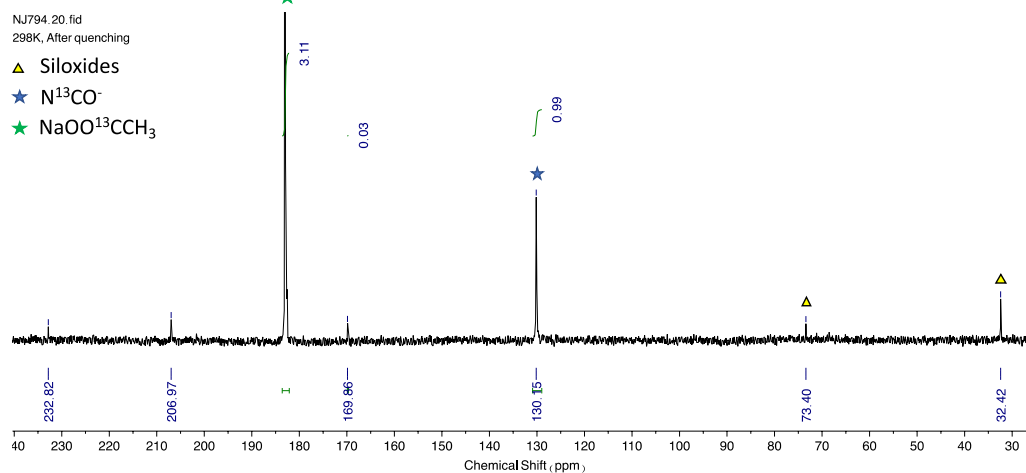

**Figure S27.**  $^1\text{H}$  NMR spectra (400 MHz,  $\text{d}_8\text{-thf}$ , 298K) of the evolution of the reaction mixture of 2 equiv. of  $[\text{Cl}(\text{N})\text{Mo}^{\text{IV}}\text{P}_2]$  with 1 equiv. of  $[\text{U}(\text{OSi}(\text{O}^t\text{Bu})_3)_2]$  at room temperature, a) immediately after addition, b) 6 hs after addition, c) 24 hs after addition at  $-40^\circ\text{C}$ .

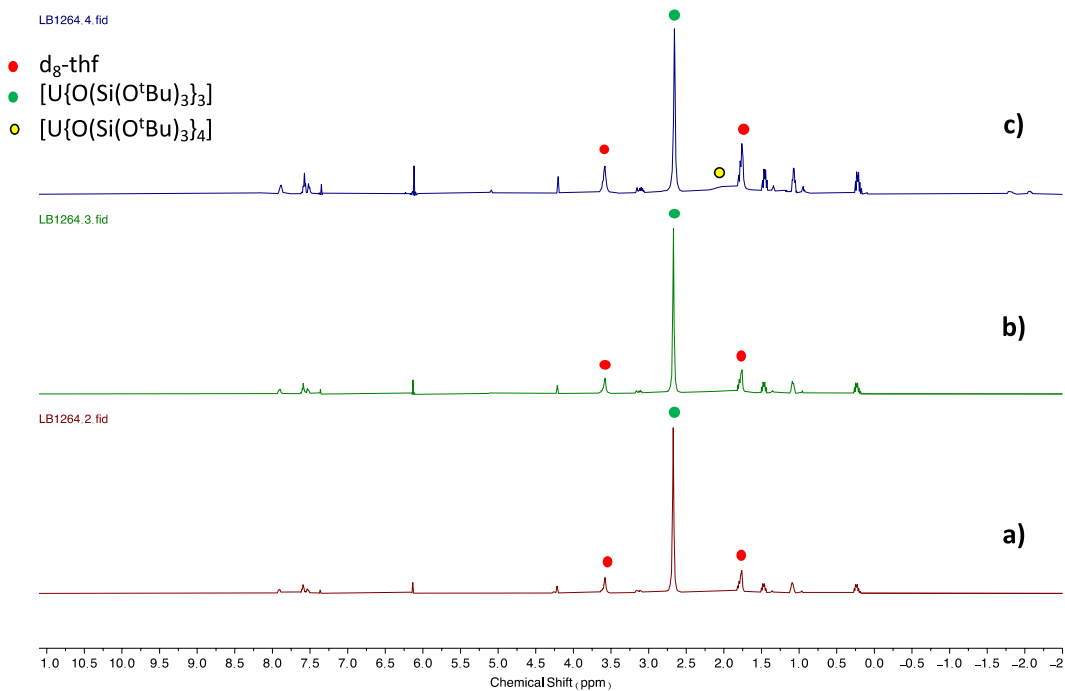

## XRD data

A translucent dark black irregular-shaped crystal with dimensions  $0.40 \times 0.23 \times 0.19 \text{ mm}^3$  was mounted and its diffraction data were collected using a SuperNova diffractometer operating at  $T = 140.00(10) \text{ K}$ . Data were measured using  $\omega$  scans using  $\text{Cu K } \alpha$  radiation. The diffraction pattern was indexed and the total number of runs and images was based on the strategy calculation from the program CrysAlisPro.<sup>4</sup> The maximum resolution that was achieved was  $\Theta = 76.009^\circ$  ( $0.79 \text{ \AA}$ ).

The unit cell was refined using CrysAlisPro<sup>4</sup> on 38652 reflections, 78% of the observed reflections. Data reduction, scaling and absorption corrections were performed using CrysAlisPro.<sup>4</sup> The final completeness is 99.80 % out to  $76.009^\circ$  in  $\Theta$ . A gaussian absorption correction was performed using CrysAlisPro.<sup>4</sup> The numerical absorption correction was based on gaussian integration over a multifaceted crystal model. The empirical absorption correction was obtained using spherical harmonics, implemented in SCALE3 ABSPACK scaling algorithm. The absorption coefficient  $\mu$  of this crystal is  $7.873 \text{ mm}^{-1}$  at this wavelength ( $\lambda = 1.54184 \text{ \AA}$ ) and the minimum and maximum transmissions are 0.194 and 0.880. The structure was solved and the space group P-1 (# 2) determined by the ShelXT<sup>5</sup> structure solution program using dual methods and refined by full matrix least squares minimisation on  $F^2$  using version 2018/3 of ShelXL.<sup>6</sup> All non-hydrogen atoms were refined anisotropically. Hydrogen atom positions were calculated geometrically and refined using the riding model. CCDC deposition number: 2126561.

**Table S1: Crystallographic parameters for complex 1**

|                                                   |                                    |
|---------------------------------------------------|------------------------------------|
| Compound                                          | 1                                  |
| Formula                                           | $C_{72}H_{135}MoNNaO_{12}P_2Si_3U$ |
| Crystal size [mm]                                 | 0.40×0.23×0.19                     |
| Crystal system                                    | triclinic                          |
| Space group                                       | P-1                                |
| V [Å <sup>3</sup> ]                               | 4186.49(16)                        |
| <i>a</i> [Å]                                      | 13.6525(2)                         |
| <i>b</i> [Å]                                      | 16.4788(4)                         |
| <i>c</i> [Å]                                      | 19.2469(4)                         |
| $\alpha$ [°]                                      | 81.3024(19)                        |
| $\beta$ [°]                                       | 79.5672(16)                        |
| $\gamma$ [°]                                      | 82.5868(18)                        |
| Z                                                 | 2                                  |
| Absorption coefficient [mm <sup>-1</sup> ]        | 7.873                              |
| F(000)                                            | 1774.0                             |
| <i>T</i> (K)                                      | 140.00(10)                         |
| Total no. reflections                             | 49516                              |
| Unique reflexions<br>[ <i>R</i> <sub>int</sub> ]  | 17241                              |
| Final <i>R</i> <sub>1</sub> [ $I > 2 \sigma(I)$ ] | 0.0268                             |
| Largest diff. peak and hole [eÅ <sup>-3</sup> ]   | 1.724 and -2.013                   |
| GOOF                                              | 1.070                              |

## EPR data

**CW EPR spectroscopy.** The solution state spectra were recorded from an 8.6 mM solution of complex **1** in THF inside J-Young EPR tubes. The solid state measurements were performed with solid samples of complex **1** inside J-Young EPR tubes or in sealed quartz tubes. X-band CW EPR spectra were acquired on a Bruker Elexsys E500 spectrometer working at 9.4 GHz frequency and on a Bruker (Billerica, MA) EMX spectrometer using a Bruker ER 4116DM Dual Mode resonator coupled to the TE-102 perpendicular mode (MW  $B_1$  perpendicular to the applied magnetic field  $B_0$ ). Acquisition parameters: MW frequency = 9.638 GHz; temperature = 5 K; MW power = 5.5 mW; modulation amplitude = 0.8 mT; conversion time = 10.10 ms. Temperature control was achieved using liquid helium and an Oxford Instruments (Oxford, UK) ESR-900 cryogen flow cryostat and an ITC-503 temperature controller

**Pulse EPR spectroscopy.** All pulse EPR experiments were acquired using a Bruker (Billerica, MA) ELEXSYS E580 pulse EPR spectrometer. All data was acquired using a Bruker MD-4 resonator. Temperature control was achieved using an ER 4118HV-CF5-L Flexline Cryogen-Free VT cryostat manufactured by ColdEdge (Allentown, PA) equipped with an Oxford Instruments Mercury ITC.

**X-band HYSCORE** spectra<sup>8</sup> were acquired using the 4-pulse sequence ( $\pi/2 - \tau - \pi/2 - t_1 - \pi - t_2 - \pi/2 -$  echo), where  $\tau$  is a fixed delay, while  $t_1$  and  $t_2$  are independently incremented by  $\Delta t_1$  and  $\Delta t_2$ , respectively. The time domain data was baseline-corrected (third-order polynomial) to eliminate the exponential decay in the echo intensity, apodized with a Hamming window function, zero-filled to eight-fold points, and fast Fourier-transformed to yield the 2-dimensional frequency domain.

In general, the ENDOR spectrum for a given nucleus with spin  $I = 1/2$  ( $^1\text{H}$ ,  $^{31}\text{P}$ ) coupled to the  $S = 1/2$  electron spin exhibits a doublet at frequencies

$$\nu_{\pm} = \left| \frac{A}{2} \pm \nu_N \right|$$

Where  $\nu_N$  is the nuclear Larmor frequency and  $A$  is the hyperfine coupling. For nuclei with  $I \geq 1$  ( $^{14}\text{N}$ ,  $^2\text{H}$ ), an additional splitting of the  $\nu_{\pm}$  manifolds is produced by the nuclear quadrupole interaction (P)

$$\nu_{\pm, m_I} = \left| \nu_N \pm \frac{3P(2m_I - 1)}{2} \right|$$

In HYSCORE spectra, these signals manifest as cross-peaks or ridges in the 2-D frequency spectrum which are generally symmetric about the diagonal of a given quadrant. This technique allows hyperfine levels corresponding to the same electron-nuclear submanifold to be differentiated, as well as separating features from hyperfine couplings in the weak-coupling regime ( $|A| < 2|\nu_I|$ ) in the (+,+) quadrant from those in the strong coupling regime ( $|A| > 2|\nu_I|$ ) in the (-,+) quadrant. The (-,-) and (+,-) quadrants of these frequency spectra are symmetric to the (+,+) and (-,+) quadrants, thus only two of the quadrants are typically displayed in literature.

For systems with appreciable hyperfine anisotropy in frozen solutions or solids, HYSCORE spectra typically do not exhibit sharp cross peaks, but show ridges that represent the sum of cross peaks from selected orientations within the excitation bandwidth of the MW pulses at the magnetic field position at which the spectrum is collected. The length and curvature of these correlation ridges can allow for the separation and estimation of the magnitude of the isotropic and dipolar components of the hyperfine tensor (Figure S28).



**Figure S28.** a) HYSCORE powder patterns for an  $S = 1/2, I = 1/2$  spin system with an isotropic hyperfine tensor  $A$ . b) HYSCORE powder patterns for an  $S = 1/2, I = 1/2$  spin system with an axial hyperfine tensor that contains isotropic ( $A_{iso}$ ) and dipolar ( $T$ ) contributions. Blue correlation ridges represent the strong coupling case; red correlation ridges represent the weak coupling case.

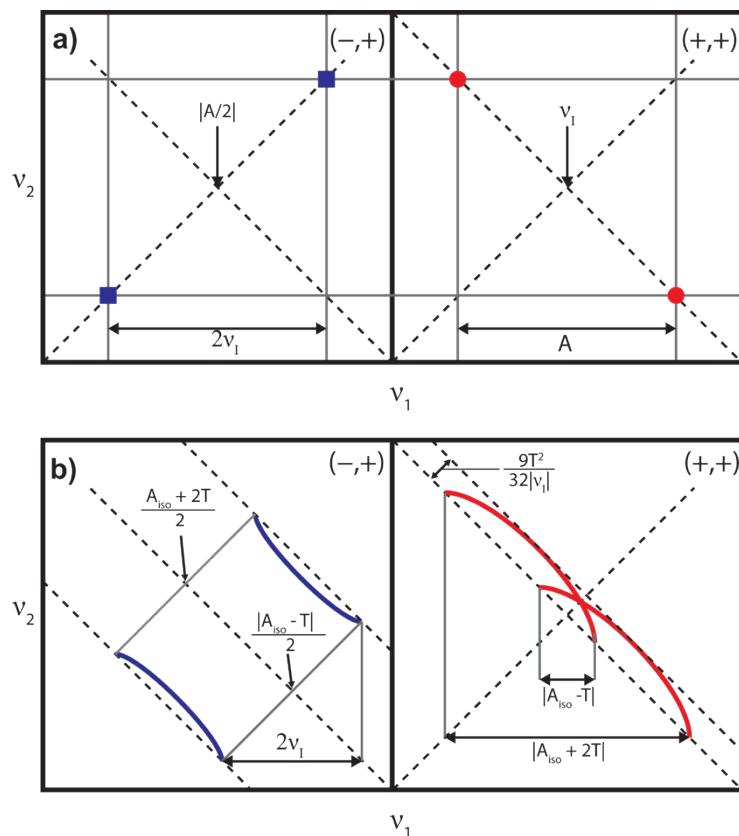

For  $I = 1$  nuclei such as  $^{14}\text{N}$ , the nuclear quadrupole interaction will further split the hyperfine correlation ridges parallel to the diagonal of the quadradrant by  $3P$ .

**Figure S29.** X-band EPR spectrum of frozen 8.4 mM solution complex **1** in THF at 10K.

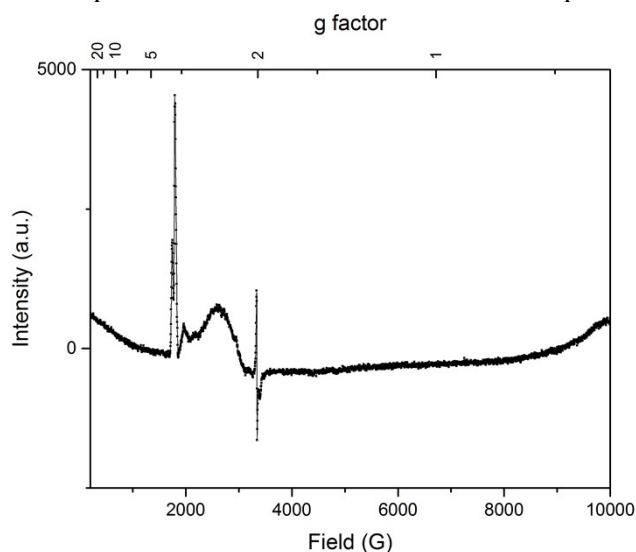

**Figure S30. (Top)** X-band CW-EPR spectrum of pure powder of **1**. Acquisition parameters: MW frequency = 9.638 GHz; temperature = 5 K; MW power = 5.5 mW; modulation amplitude = 0.8 mT; conversion time = 10.10 ms. (A signal centred at  $g = 1.99$  is sometimes observed which is due to degradation products.

**(Bottom)** X-band electron spin-echo (ESE) detected EPR spectrum of pure powder of **1** (top trace), with same spectrum treated with pseudomodulation (bottom trace) to generate the “CW-like” 1<sup>st</sup> derivative using an amplitude of 20 mT. Acquisition parameters: MW frequency = 9.387 GHz; temperature = 6 K;  $\pi$  pulse length = 16 ns;  $\tau = 200$  ns; shot rep time (srt) = 500  $\mu$ s.

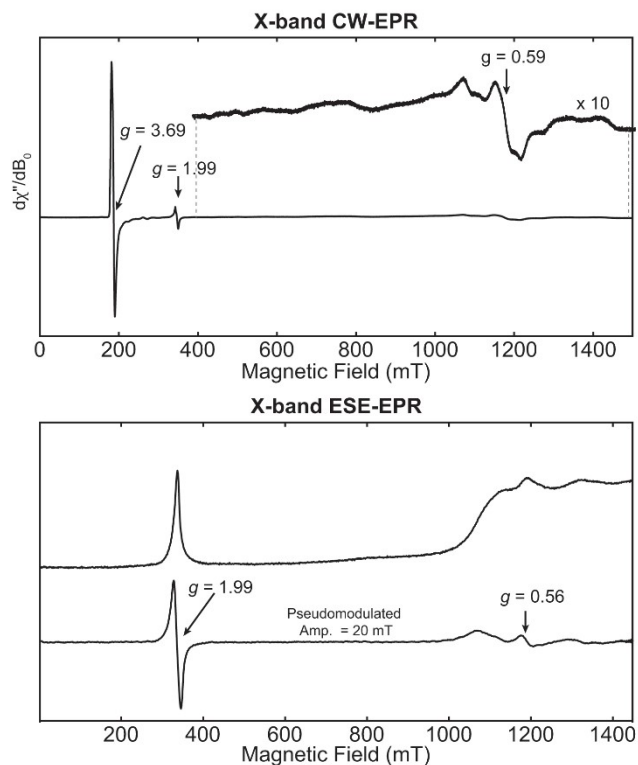



**Figure S31.** X-band HYSCORE spectra of pure powder of **1** acquired at 1000 mT ( $g = 0.671$ ), 1060 mT ( $g = 0.633$ ), 1200 mT ( $g = 0.559$ ), 1440 mT ( $g = 0.466$ ). Acquisition parameters: MW frequency = 9.387 GHz; temperature = 6 K;  $\tau = 100$  ns,  $t_1 = t_2 = 100$  ns;  $\Delta t_1 = \Delta t_2 = 16$  ns; shot repetition time (srt) = 500  $\mu$ s.

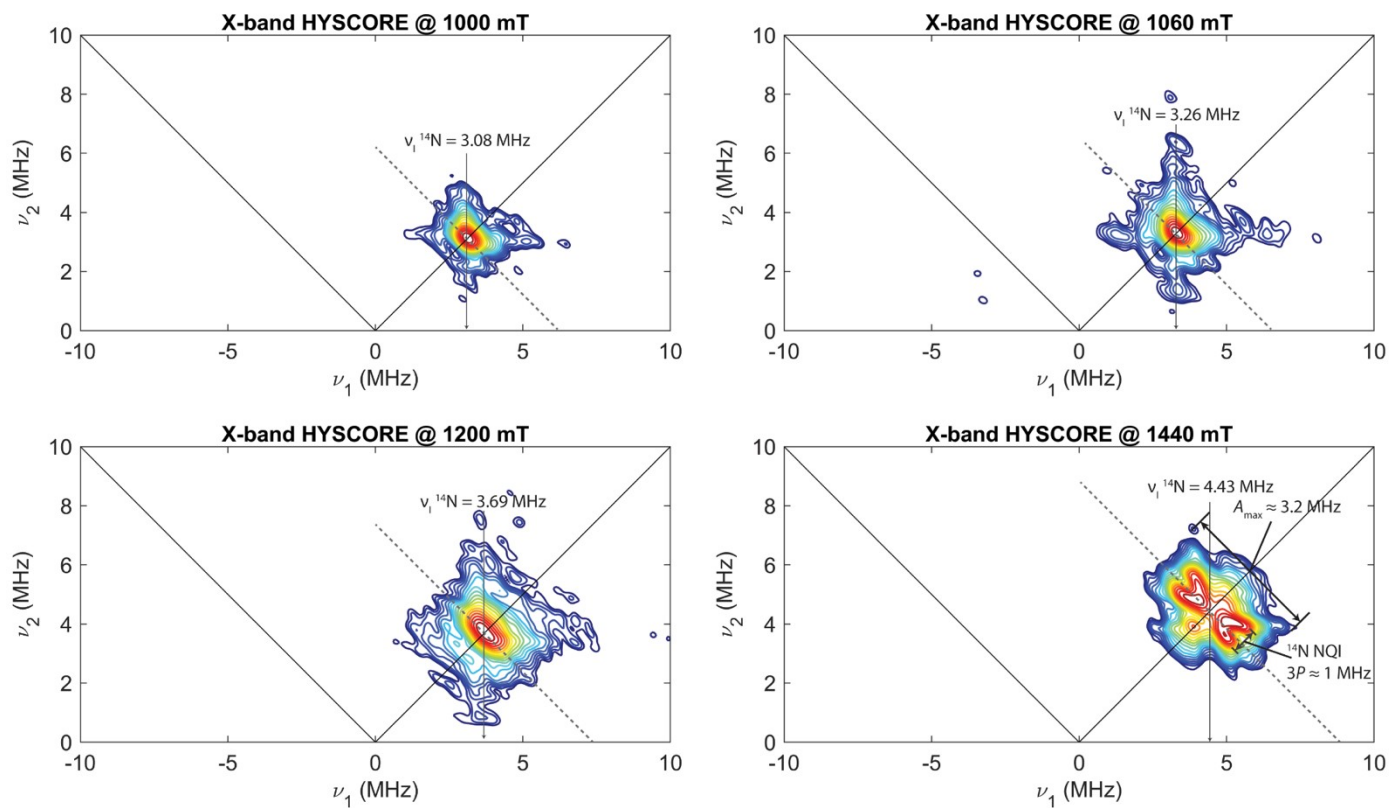

**Figure S32.** X-band HYSCORE spectrum of pure powder of **1** acquired at 339 mT ( $g = 1.98$ ), a magnetic field corresponding to the narrow signal associated with degradation product(s) of **1**. Acquisition parameters: MW frequency = 9.387 GHz; temperature = 6 K;  $\tau = 100$  ns,  $t_1 = t_2 = 100$  ns;  $\Delta t_1 = \Delta t_2 = 16$  ns; shot repetition time (srt) = 500  $\mu$ s.

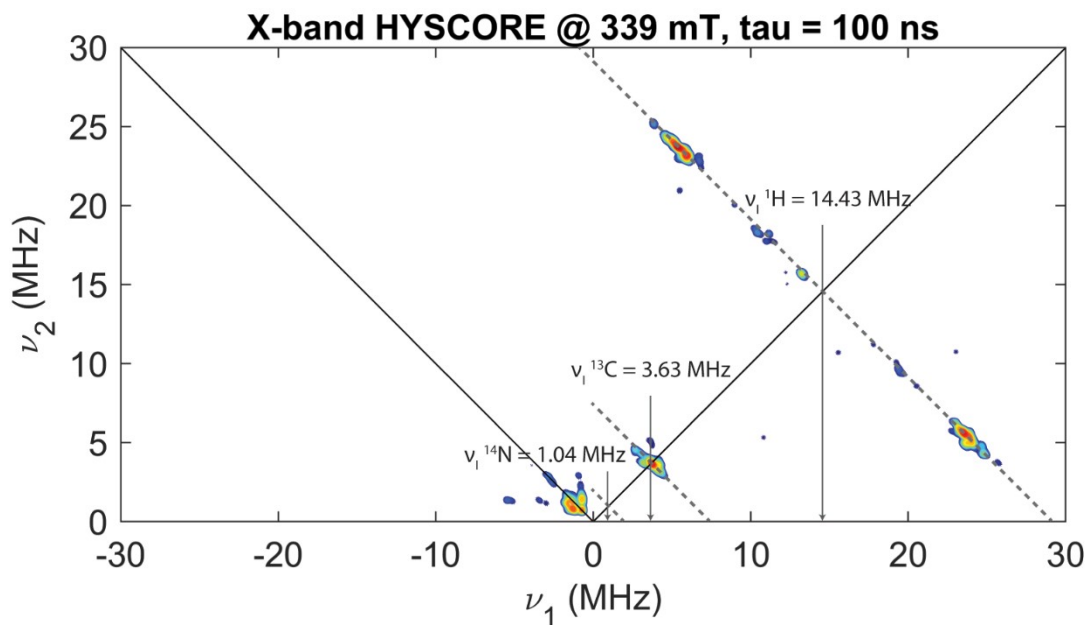

## Computational details

The optimization of three different spin states (S=2, 4 and 6) for complex **1** were carried out by employing unrestricted-DFT hybrid functional (B3PW91) <sup>7</sup> along with small core relativistic effective core potential Stuttgart basis set for uranium, molybdenum, phosphorus, and silicon atoms with additional polarization functions for phosphorus and silicon atoms.<sup>9</sup> Pople basis sets (6-31++G\*\* basis set for sodium and 6-31G\*\* for carbon, nitrogen, oxygen, hydrogen atoms) were employed for the rest of the atoms.<sup>10</sup> Frequency calculations were performed to locate minima for the optimized structures. All the calculations were performed using Gaussian 09 suite of programs.<sup>11</sup> NBO analysis was done in two main steps. The first one defines the Natural Localized Molecular Orbital (NLMO) which are the bonds and the lone pairs. These NLMO are thus used in a second step as possible donor (when occupied) and potential acceptor (when empty) to look for the presence of donor-acceptor bonds in the complex. The donor-acceptor interactions are accounted for at the

second order perturbation level by computing an interaction energy ( $\propto \frac{S^2}{\Delta\epsilon}$ ).

Bonding orbitals between uranium and nitrogen from NBO analysis for ground state spin (2s+1=2)

(0.98344) BD ( 1) U 1 - N 21  
 ( 33.62%) 0.5798\* U 1 s( 0.01%)p23.29( 0.32%)d99.99( 28.73%) f99.99( 70.90%)g 3.10( 0.04%)  
 ( 66.38%) 0.8147\* N 21 s( 13.91%)p 6.17( 85.78%)d 0.02( 0.31%)  
 (0.96717) BD ( 2) U 1 - N 21  
 ( 28.06%) 0.5297\* U 1 s( 0.00%)p 1.00( 0.87%)d34.46( 30.14%) f78.84( 68.95%)g 0.04( 0.03%)  
 ( 71.94%) 0.8482\* N 21 s( 0.00%)p 1.00( 99.77%)d 0.00( 0.23%)  
 (0.83262) BD ( 3) U 1 - N 21  
 ( 20.20%) 0.4495\* U 1 s( 0.17%)p 8.84( 1.54%)d99.99( 43.36%) f99.99( 54.88%)g 0.24( 0.04%)  
 ( 79.80%) 0.8933\* N 21 s( 7.47%)p12.37( 92.36%)d 0.02( 0.17%)

**Table ST1: Computed Wiberg bond index for UNMo core (2s+1=2)**

| Atom Label | Wiberg bond index | Atom Label | Wiberg bond index |
|------------|-------------------|------------|-------------------|
| U1         | 0.0000            | U1         | 0.5243            |
| Mo2        | 0.5243            | Mo2        | 0.0000            |
| N21        | 2.2633            | N21        | 0.7308            |

**Table ST2: Computed spin densities for UNMo core**

| Atom Label | Spin density |        |        |
|------------|--------------|--------|--------|
|            | 2s+1=2       | 2s+1=4 | 2s+1=6 |
| U1         | 1.24         | 2.35   | 3.28   |
| Mo2        | -0.05        | 0.72   | 0.70   |
| N21        | -0.13        | 0.02   | 0.49   |

**Table ST3: Energetics of different spin states computed for UNMo complex**

| Spin states | $\Delta H$ (kcal/mol) |
|-------------|-----------------------|
| 2s+1=2      | 0.0                   |
| 2s+1=4      | 6.32                  |
| 2s+1=6      | 23.07                 |

**Table ST4: DFT computed NBO second order perturbation analysis for 2s+1=2 spin state. For sake of clarity only the alpha part is reported since the beta part is similar. The value between bracket before the donor or acceptor unit indicates the electron occupancy.**

| Donor NBO                                                                                                                                                                                                                                                                                             | Acceptor NBO                                                                                                                                                                                         | E(2)<br>kcal/mol |
|-------------------------------------------------------------------------------------------------------------------------------------------------------------------------------------------------------------------------------------------------------------------------------------------------------|------------------------------------------------------------------------------------------------------------------------------------------------------------------------------------------------------|------------------|
| <p><u>(0.84547) LP ( 1) N 21</u></p> <p>s( 78.62%)p 0.27( 21.34%)d 0.00( 0.04%)</p> 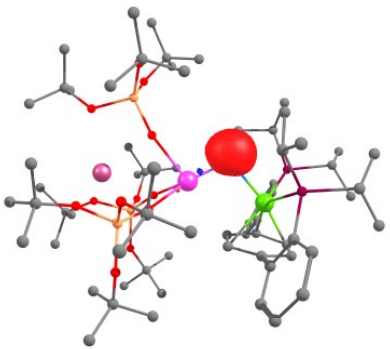                                                                                                                                 | <p><u>(0.12375) LP*( 1) U 1</u></p> <p>s( 0.33%)p 0.60( 0.20%)d99.99( 57.42%) f99.99( 42.03%)g 0.02( 0.01%)</p>    | 12.65            |
| <p><u>(0.84547) LP ( 1) N 21</u></p> <p>s( 78.62%)p 0.27( 21.34%)d 0.00( 0.04%)</p>                                                                                                                                | <p><u>(0.08514) LP*( 5) U 1</u></p> <p>s( 0.18%)p12.19( 2.21%)d99.99( 63.71%) f99.99( 33.90%)g 0.04( 0.01%)</p>  | 7.38             |
| <p><u>(0.98344) BD ( 1) U 1 - N 21 ( 33.62%) 0.5798* U 1 s( 0.01%)p23.29( 0.32%)d99.99( 28.73%)f99.99( 70.90%)g 3.10( 0.04%)</u></p> <p><u>( 66.38%) 0.8147* N 21 s( 13.91%)p 6.17( 85.78%)d 0.02( 0.31%)</u></p>  | <p><u>(0.22822) LP*( 2) Mo 2</u></p> <p>s( 37.59%)p 0.69( 25.92%)d 0.97( 36.49%)</p>                             | 6.54             |

|                                                                                                                                                                                                                                                                                               |                                                                                                                                                                   |       |
|-----------------------------------------------------------------------------------------------------------------------------------------------------------------------------------------------------------------------------------------------------------------------------------------------|-------------------------------------------------------------------------------------------------------------------------------------------------------------------|-------|
| <p>(0.83262) BD ( 3) U 1 - N 21</p> <p>( 20.20%) 0.4495* U 1 s( 0.17%)p 8.84( 1.54%)d99.99( 43.36%)f99.99( 54.88%)g 0.24( 0.04%)</p> <p>( 79.80%) 0.8933* N 21 s( 7.47%)p12.37( 92.36%)d 0.02( 0.17%)</p> 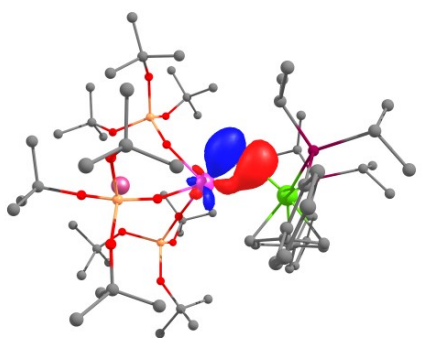   | <p>(0.22822) LP*( 2)Mo 2</p> <p>s( 37.59%)p 0.69( 25.92%)d 0.97( 36.49%)</p>    | 40.58 |
| <p>(0.83262) BD ( 3) U 1 - N 21</p> <p>( 20.20%) 0.4495* U 1 s( 0.17%)p 8.84( 1.54%)d99.99( 43.36%)f99.99( 54.88%)g 0.24( 0.04%)</p> <p>( 79.80%) 0.8933* N 21 s( 7.47%)p12.37( 92.36%)d 0.02( 0.17%)</p>  | <p>(0.16714) LP*( 3)Mo 2</p> <p>s( 11.48%)p 6.04( 69.36%)d 1.67( 19.16%)</p>   | 19.71 |
| <p>(0.84547) LP ( 1) N 21</p> <p>s( 78.62%)p 0.27( 21.34%)d 0.00( 0.04%)</p>                                                                                                                               | <p>(0.22822) LP*( 2)Mo 2</p> <p>s( 37.59%)p 0.69( 25.92%)d 0.97( 36.49%)</p>  | 34.94 |
| <p>(0.84547) LP ( 1) N 21</p> <p>s( 78.62%)p 0.27( 21.34%)d 0.00( 0.04%)</p>                                                                                                                                                                                                                  | <p>(0.16714) LP*( 3)Mo 2</p> <p>s( 11.48%)p 6.04( 69.36%)d 1.67( 19.16%)</p>                                                                                      | 21.63 |

|                                                                                                                                                                  |                                                                                                                                                                                               |       |
|------------------------------------------------------------------------------------------------------------------------------------------------------------------|-----------------------------------------------------------------------------------------------------------------------------------------------------------------------------------------------|-------|
|                                                                                 |                                                                                                             |       |
| <p>(0.16714) LP*( 3)Mo 2</p> <p>s( 11.48%)p 6.04( 69.36%)d 1.67( 19.16%)</p>   | <p>(0.05464) LP*( 6) U 1</p> <p>s( 2.17%)p37.80( 81.86%)d 3.67( 7.94%)f 3.71( 8.03%)g 0.00( 0.01%)</p>     | 38.92 |
| <p>(0.16714) LP*( 3)Mo 2</p> <p>s( 11.48%)p 6.04( 69.36%)d 1.67( 19.16%)</p>  | <p>(0.03593) LP*( 8) U 1</p> <p>s( 6.22%)p 3.53( 21.95%)d 3.35( 20.81%)f 8.20( 50.99%)g 0.01( 0.04%)</p>  | 28.11 |
| <p>(0.16714) LP*( 3)Mo 2</p> <p>s( 11.48%)p 6.04( 69.36%)d 1.67( 19.16%)</p>  | <p>(0.03280) LP*( 9) U 1</p> <p>s( 79.76%)p 0.05( 3.68%)d 0.05( 4.26%)f 0.15( 12.29%)g 0.00( 0.00%)</p>   | 10.00 |

**Figure S33:** DFT computed MO's (a) HOMO-13 (b) HOMO-12 (c) HOMO-10 (d) HOMO-5 (e) HOMO-4 (f) HOMO-3 (g) HOMO-2 (h) HOMO-1 (i) HOMO for ground spin state of **1**

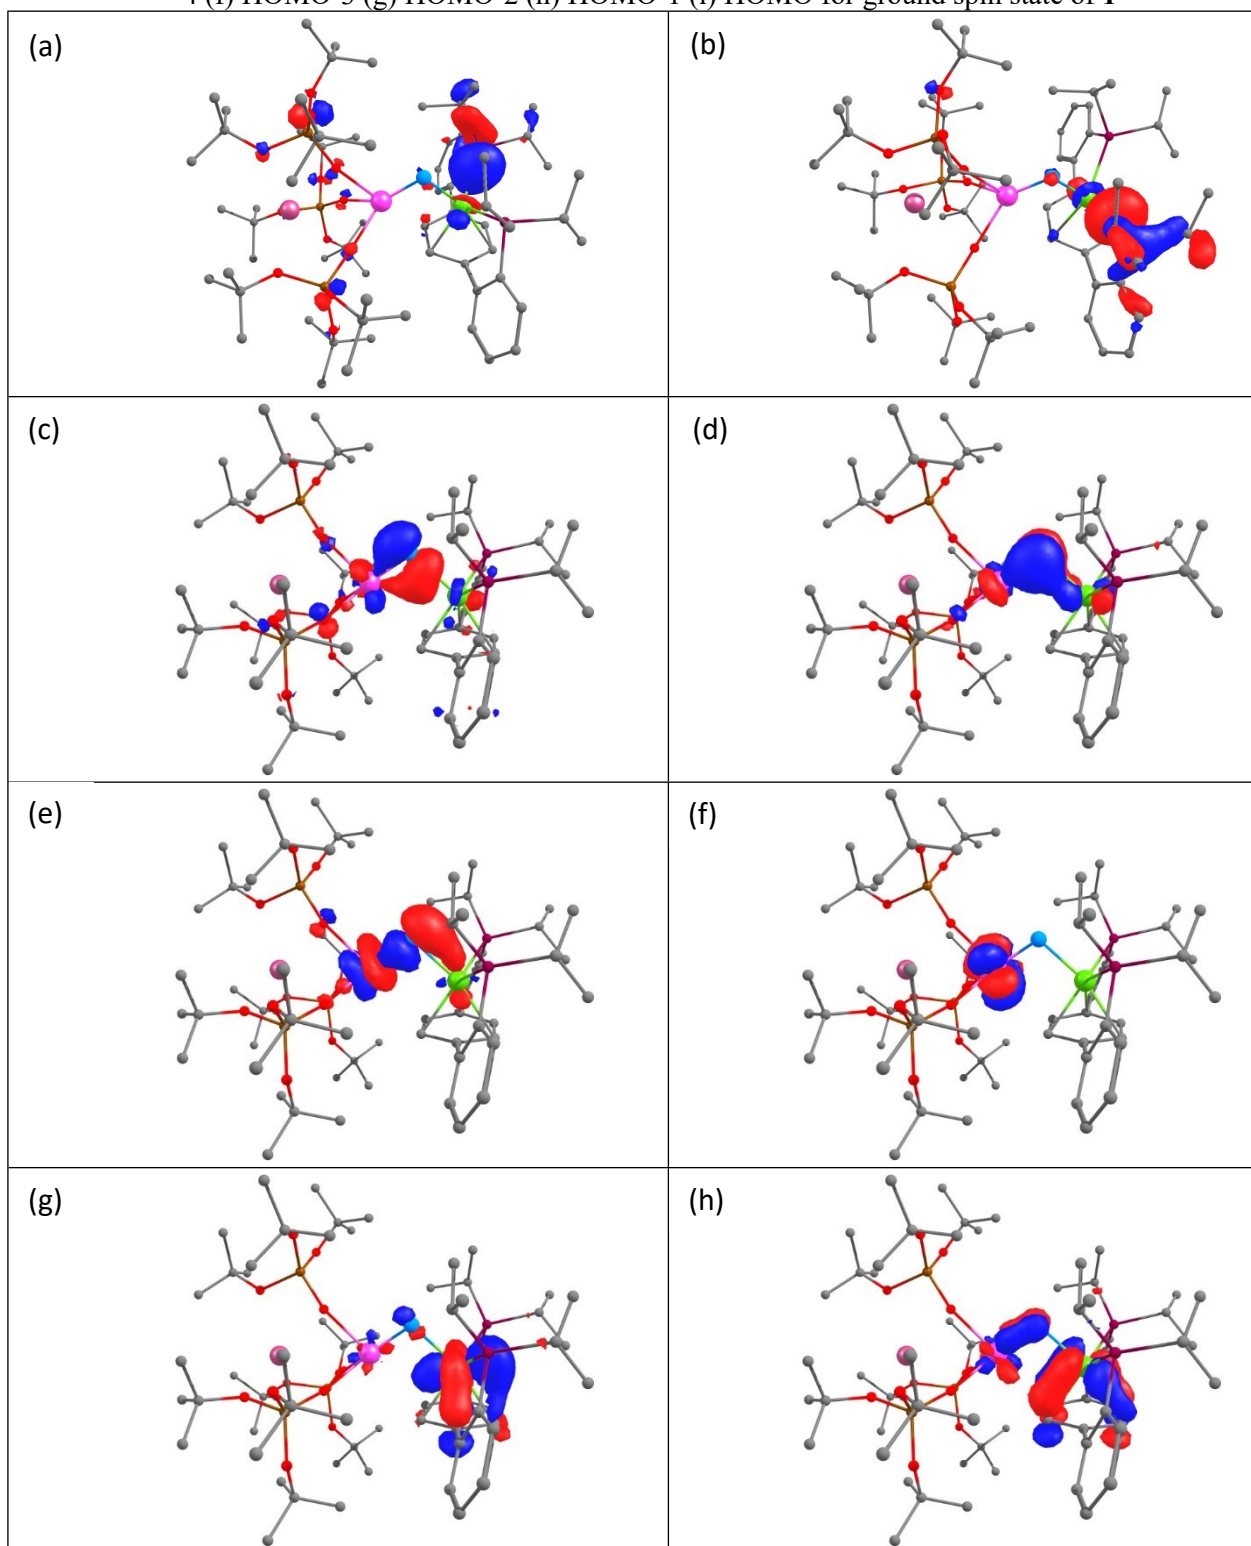

(i)

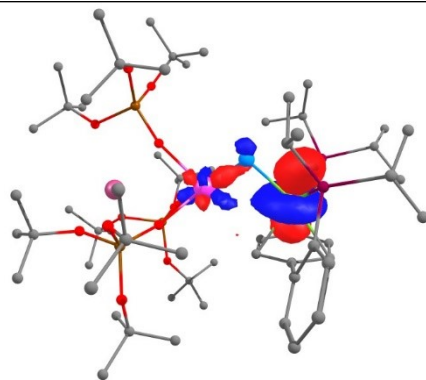



DFT optimized geometry of different spin states for 1  
Doublet

|    |              |              |              |
|----|--------------|--------------|--------------|
| U  | 13.373014000 | 7.508402000  | 14.309249000 |
| Mo | 14.054513000 | 10.438451000 | 15.203738000 |
| P  | 12.592982000 | 11.984486000 | 13.784119000 |
| P  | 16.535300000 | 10.911015000 | 14.833859000 |
| Si | 14.303842000 | 4.508047000  | 16.563289000 |
| Si | 9.766138000  | 6.142340000  | 14.379542000 |
| Si | 13.946501000 | 5.195736000  | 11.273678000 |
| Na | 12.416378000 | 4.304268000  | 13.901776000 |
| O  | 14.066600000 | 5.744646000  | 15.517618000 |
| O  | 15.896142000 | 4.116063000  | 16.845905000 |
| O  | 13.599295000 | 4.678158000  | 18.058553000 |
| O  | 13.466498000 | 3.210826000  | 15.844509000 |
| O  | 11.302513000 | 6.667215000  | 14.581467000 |
| O  | 8.967692000  | 6.754345000  | 13.051812000 |
| O  | 9.944509000  | 4.482477000  | 14.043751000 |
| O  | 8.741265000  | 6.423176000  | 15.664034000 |
| O  | 13.469778000 | 6.064380000  | 12.570414000 |
| O  | 15.588432000 | 4.968788000  | 11.109708000 |
| O  | 13.447491000 | 5.742550000  | 9.779228000  |
| O  | 13.307797000 | 3.656540000  | 11.634079000 |
| N  | 14.034595000 | 9.038130000  | 13.553368000 |
| C  | 17.050721000 | 4.105051000  | 15.989713000 |
| C  | 16.714584000 | 3.502333000  | 14.626778000 |
| H  | 17.611707000 | 3.446856000  | 14.002180000 |
| H  | 15.978534000 | 4.111516000  | 14.095068000 |
| H  | 16.315750000 | 2.490069000  | 14.740189000 |
| C  | 18.087316000 | 3.243378000  | 16.713350000 |
| H  | 17.718333000 | 2.221419000  | 16.842380000 |
| H  | 18.301919000 | 3.657246000  | 17.703196000 |
| H  | 19.021940000 | 3.204453000  | 16.144677000 |
| C  | 17.560763000 | 5.536078000  | 15.837322000 |
| H  | 18.468780000 | 5.562408000  | 15.225888000 |
| H  | 17.789831000 | 5.970614000  | 16.814646000 |
| H  | 16.801564000 | 6.155307000  | 15.354793000 |
| C  | 13.947434000 | 5.220079000  | 19.343564000 |
| C  | 12.928516000 | 6.317529000  | 19.654959000 |
| H  | 13.093422000 | 6.725839000  | 20.657696000 |
| H  | 11.912959000 | 5.914501000  | 19.608838000 |
| H  | 13.006713000 | 7.136817000  | 18.935291000 |
| C  | 15.366469000 | 5.781992000  | 19.374497000 |
| H  | 15.492546000 | 6.574963000  | 18.632574000 |
| H  | 16.101564000 | 5.003000000  | 19.165366000 |
| H  | 15.572231000 | 6.207756000  | 20.362515000 |
| C  | 13.816455000 | 4.081552000  | 20.359115000 |
| H  | 14.001812000 | 4.448372000  | 21.374069000 |
| H  | 14.539128000 | 3.287965000  | 20.147526000 |
| H  | 12.810334000 | 3.652593000  | 20.329245000 |
| C  | 13.212692000 | 1.911152000  | 16.440533000 |
| C  | 13.007934000 | 0.944624000  | 15.276340000 |
| H  | 12.809732000 | -0.066447000 | 15.646415000 |
| H  | 13.897999000 | 0.910437000  | 14.641560000 |
| H  | 12.151785000 | 1.248025000  | 14.667380000 |

|   |              |              |              |
|---|--------------|--------------|--------------|
| C | 11.942831000 | 2.000619000  | 17.285896000 |
| H | 11.101544000 | 2.332301000  | 16.671636000 |
| H | 12.079374000 | 2.719225000  | 18.095567000 |
| H | 11.694204000 | 1.022920000  | 17.712728000 |
| C | 14.388920000 | 1.432273000  | 17.291960000 |
| H | 14.158829000 | 0.445560000  | 17.707483000 |
| H | 14.583896000 | 2.115286000  | 18.120487000 |
| H | 15.300282000 | 1.350676000  | 16.695072000 |
| C | 8.186413000  | 7.952095000  | 12.883307000 |
| C | 6.751943000  | 7.678353000  | 13.340286000 |
| H | 6.315972000  | 6.857692000  | 12.761206000 |
| H | 6.126324000  | 8.565698000  | 13.195769000 |
| H | 6.737735000  | 7.408600000  | 14.398902000 |
| C | 8.215796000  | 8.256704000  | 11.385515000 |
| H | 9.241552000  | 8.439245000  | 11.053511000 |
| H | 7.614133000  | 9.143207000  | 11.160183000 |
| H | 7.813630000  | 7.413223000  | 10.815698000 |
| C | 8.793203000  | 9.106528000  | 13.672627000 |
| H | 8.779242000  | 8.895851000  | 14.744665000 |
| H | 8.231556000  | 10.030032000 | 13.505349000 |
| H | 9.828107000  | 9.280309000  | 13.366445000 |
| C | 8.922751000  | 3.579325000  | 13.540762000 |
| C | 8.842704000  | 3.718501000  | 12.021514000 |
| H | 8.544196000  | 4.732566000  | 11.750437000 |
| H | 8.116628000  | 3.008835000  | 11.610113000 |
| H | 9.817097000  | 3.513810000  | 11.570382000 |
| C | 9.379862000  | 2.171658000  | 13.917233000 |
| H | 10.343093000 | 1.939810000  | 13.453910000 |
| H | 8.656641000  | 1.428163000  | 13.566963000 |
| H | 9.476736000  | 2.070783000  | 15.002011000 |
| C | 7.558590000  | 3.855710000  | 14.171726000 |
| H | 7.592536000  | 3.724100000  | 15.255872000 |
| H | 6.821071000  | 3.154564000  | 13.767244000 |
| H | 7.219801000  | 4.870443000  | 13.956284000 |
| C | 8.783995000  | 6.175042000  | 17.077559000 |
| C | 7.330902000  | 5.955426000  | 17.507064000 |
| H | 6.724095000  | 6.829357000  | 17.251550000 |
| H | 7.267510000  | 5.795387000  | 18.588246000 |
| H | 6.903164000  | 5.084130000  | 17.003655000 |
| C | 9.631039000  | 4.947441000  | 17.403008000 |
| H | 9.242519000  | 4.060783000  | 16.895350000 |
| H | 9.618874000  | 4.753991000  | 18.480734000 |
| H | 10.671947000 | 5.093874000  | 17.101302000 |
| C | 9.345836000  | 7.413209000  | 17.773779000 |
| H | 10.391724000 | 7.569916000  | 17.501878000 |
| H | 9.290719000  | 7.304604000  | 18.862175000 |
| H | 8.774640000  | 8.299776000  | 17.484779000 |
| C | 16.586769000 | 5.644872000  | 10.322756000 |
| C | 17.913519000 | 5.373047000  | 11.033208000 |
| H | 17.891644000 | 5.777195000  | 12.048673000 |
| H | 18.746021000 | 5.833443000  | 10.490994000 |
| H | 18.097397000 | 4.295922000  | 11.096670000 |
| C | 16.312803000 | 7.146055000  | 10.249412000 |
| H | 15.390186000 | 7.339621000  | 9.698472000  |
| H | 17.134411000 | 7.657193000  | 9.736234000  |
| H | 16.213683000 | 7.573071000  | 11.249534000 |

|   |              |              |              |
|---|--------------|--------------|--------------|
| C | 16.607945000 | 5.040655000  | 8.917059000  |
| H | 16.810602000 | 3.965709000  | 8.962639000  |
| H | 17.391006000 | 5.508028000  | 8.310160000  |
| H | 15.646059000 | 5.199508000  | 8.422941000  |
| C | 12.243033000 | 6.372284000  | 9.317804000  |
| C | 11.014342000 | 5.715229000  | 9.938688000  |
| H | 11.004008000 | 4.643192000  | 9.722683000  |
| H | 10.097615000 | 6.154208000  | 9.532651000  |
| H | 10.997815000 | 5.856843000  | 11.022408000 |
| C | 12.238222000 | 6.184073000  | 7.799285000  |
| H | 13.139304000 | 6.621576000  | 7.358914000  |
| H | 11.364348000 | 6.668456000  | 7.351661000  |
| H | 12.213620000 | 5.120537000  | 7.543436000  |
| C | 12.299608000 | 7.857874000  | 9.668823000  |
| H | 12.382846000 | 7.994270000  | 10.750262000 |
| H | 11.400527000 | 8.374211000  | 9.315288000  |
| H | 13.169692000 | 8.326110000  | 9.199011000  |
| C | 13.589398000 | 2.404504000  | 10.962405000 |
| C | 14.913483000 | 1.847084000  | 11.486938000 |
| H | 15.130059000 | 0.874678000  | 11.031348000 |
| H | 14.866045000 | 1.715672000  | 12.571884000 |
| H | 15.728677000 | 2.537335000  | 11.262873000 |
| C | 13.643582000 | 2.579465000  | 9.444565000  |
| H | 14.444863000 | 3.259005000  | 9.150803000  |
| H | 12.699580000 | 2.977448000  | 9.063231000  |
| H | 13.824809000 | 1.609986000  | 8.968434000  |
| C | 12.440817000 | 1.462619000  | 11.319744000 |
| H | 12.588036000 | 0.483510000  | 10.852482000 |
| H | 11.485761000 | 1.867714000  | 10.972568000 |
| H | 12.386871000 | 1.310932000  | 12.401293000 |
| C | 12.259110000 | 10.705712000 | 16.483254000 |
| C | 12.623629000 | 9.322439000  | 16.530382000 |
| H | 11.859287000 | 8.563187000  | 16.352798000 |
| C | 13.983315000 | 8.945492000  | 16.889897000 |
| H | 14.263427000 | 7.896159000  | 16.984083000 |
| C | 14.937408000 | 9.970012000  | 17.195370000 |
| C | 14.516234000 | 11.336578000 | 17.261358000 |
| H | 15.231572000 | 12.096483000 | 17.549495000 |
| C | 13.202603000 | 11.701160000 | 16.904011000 |
| H | 12.907425000 | 12.743930000 | 16.912768000 |
| C | 10.970893000 | 11.243918000 | 15.968668000 |
| C | 9.804343000  | 11.173394000 | 16.738556000 |
| H | 9.825186000  | 10.620994000 | 17.673997000 |
| C | 8.646119000  | 11.836124000 | 16.338968000 |
| H | 7.746752000  | 11.774826000 | 16.946038000 |
| C | 8.658953000  | 12.607345000 | 15.178157000 |
| H | 7.770447000  | 13.155075000 | 14.874748000 |
| C | 9.817930000  | 12.683122000 | 14.406100000 |
| H | 9.813335000  | 13.309297000 | 13.519594000 |
| C | 10.976593000 | 11.981288000 | 14.765652000 |
| C | 12.071262000 | 11.307171000 | 12.073970000 |
| H | 11.736302000 | 10.299206000 | 12.349207000 |
| C | 10.941407000 | 12.013319000 | 11.327252000 |
| H | 9.996440000  | 11.990703000 | 11.873606000 |
| H | 10.772228000 | 11.509896000 | 10.367065000 |
| H | 11.185007000 | 13.056900000 | 11.096253000 |

|   |              |              |              |
|---|--------------|--------------|--------------|
| C | 13.299163000 | 11.133385000 | 11.179073000 |
| H | 13.685044000 | 12.090222000 | 10.815702000 |
| H | 13.027993000 | 10.541572000 | 10.298001000 |
| H | 14.086218000 | 10.602569000 | 11.717556000 |
| C | 12.748022000 | 13.872406000 | 13.491883000 |
| H | 11.864386000 | 14.154526000 | 12.905289000 |
| C | 12.714158000 | 14.656770000 | 14.804029000 |
| H | 11.811807000 | 14.454907000 | 15.387011000 |
| H | 12.743150000 | 15.732896000 | 14.593367000 |
| H | 13.583546000 | 14.423683000 | 15.426281000 |
| C | 14.001192000 | 14.234170000 | 12.695244000 |
| H | 14.897086000 | 13.836198000 | 13.181639000 |
| H | 14.107693000 | 15.324445000 | 12.635830000 |
| H | 13.977603000 | 13.850373000 | 11.673783000 |
| C | 16.395391000 | 9.736769000  | 17.387584000 |
| C | 16.886839000 | 9.138302000  | 18.552052000 |
| H | 16.183914000 | 8.813908000  | 19.313954000 |
| C | 18.257320000 | 8.970093000  | 18.743587000 |
| H | 18.625166000 | 8.496435000  | 19.649872000 |
| C | 19.150344000 | 9.415462000  | 17.771606000 |
| H | 20.220286000 | 9.282022000  | 17.908413000 |
| C | 18.669920000 | 10.031328000 | 16.616015000 |
| H | 19.380349000 | 10.352952000 | 15.860836000 |
| C | 17.295732000 | 10.204193000 | 16.406361000 |
| C | 17.617946000 | 10.066089000 | 13.521924000 |
| H | 18.653987000 | 10.357072000 | 13.732835000 |
| C | 17.517866000 | 8.549156000  | 13.634565000 |
| H | 17.831406000 | 8.197187000  | 14.619888000 |
| H | 18.163593000 | 8.073890000  | 12.886726000 |
| H | 16.487866000 | 8.224945000  | 13.458095000 |
| C | 17.242734000 | 10.554189000 | 12.123820000 |
| H | 16.202534000 | 10.303925000 | 11.900088000 |
| H | 17.877568000 | 10.069655000 | 11.372154000 |
| H | 17.367137000 | 11.635798000 | 12.008626000 |
| C | 17.229887000 | 12.698664000 | 14.721724000 |
| H | 16.834901000 | 13.012465000 | 13.746203000 |
| C | 16.625650000 | 13.611319000 | 15.785160000 |
| H | 15.536038000 | 13.538350000 | 15.803103000 |
| H | 16.897593000 | 14.655200000 | 15.587216000 |
| H | 17.004763000 | 13.358481000 | 16.782121000 |
| C | 18.749645000 | 12.869553000 | 14.697282000 |
| H | 19.198527000 | 12.588236000 | 15.654975000 |
| H | 18.994276000 | 13.925358000 | 14.526043000 |
| H | 19.238163000 | 12.296509000 | 13.904548000 |

#### Quartet

|    |              |              |              |
|----|--------------|--------------|--------------|
| U  | 13.412578000 | 7.443300000  | 14.342736000 |
| Mo | 13.904430000 | 10.587536000 | 15.145470000 |
| P  | 12.488985000 | 12.205732000 | 13.679962000 |
| P  | 16.433644000 | 10.863413000 | 14.787832000 |
| Si | 14.293618000 | 4.440034000  | 16.669791000 |
| Si | 9.787616000  | 6.086277000  | 14.388640000 |
| Si | 14.107935000 | 5.158229000  | 11.271232000 |
| Na | 12.460031000 | 4.291079000  | 13.893578000 |
| O  | 14.113243000 | 5.716812000  | 15.677375000 |
| O  | 15.876762000 | 4.040803000  | 17.028480000 |

|   |              |              |              |
|---|--------------|--------------|--------------|
| O | 13.529715000 | 4.547386000  | 18.151121000 |
| O | 13.488616000 | 3.167166000  | 15.865979000 |
| O | 11.334336000 | 6.564500000  | 14.565510000 |
| O | 8.953670000  | 6.758223000  | 13.110359000 |
| O | 9.915471000  | 4.435945000  | 13.995187000 |
| O | 8.803132000  | 6.343314000  | 15.713402000 |
| O | 13.725636000 | 6.039243000  | 12.584814000 |
| O | 15.729460000 | 4.838888000  | 11.044763000 |
| O | 13.595833000 | 5.757835000  | 9.799317000  |
| O | 13.391000000 | 3.651479000  | 11.623755000 |
| N | 13.611483000 | 9.286794000  | 13.652090000 |
| C | 17.066156000 | 4.103946000  | 16.223424000 |
| C | 16.776234000 | 3.703195000  | 14.777447000 |
| H | 17.697060000 | 3.712729000  | 14.185794000 |
| H | 16.069443000 | 4.394733000  | 14.310967000 |
| H | 16.355553000 | 2.694371000  | 14.732946000 |
| C | 18.052208000 | 3.123738000  | 16.861745000 |
| H | 17.658804000 | 2.103460000  | 16.830031000 |
| H | 18.229402000 | 3.390037000  | 17.908258000 |
| H | 19.011091000 | 3.141014000  | 16.333517000 |
| C | 17.615187000 | 5.528109000  | 16.291195000 |
| H | 18.529315000 | 5.626154000  | 15.696167000 |
| H | 17.847245000 | 5.803261000  | 17.324424000 |
| H | 16.870934000 | 6.229508000  | 15.907634000 |
| C | 13.972304000 | 4.936799000  | 19.460989000 |
| C | 12.696449000 | 5.177520000  | 20.269907000 |
| H | 12.938090000 | 5.471849000  | 21.296518000 |
| H | 12.089343000 | 4.267770000  | 20.306266000 |
| H | 12.099505000 | 5.971054000  | 19.811800000 |
| C | 14.801789000 | 6.217752000  | 19.397833000 |
| H | 14.208541000 | 7.037248000  | 18.983219000 |
| H | 15.689999000 | 6.074549000  | 18.777315000 |
| H | 15.128451000 | 6.510363000  | 20.401687000 |
| C | 14.787056000 | 3.802233000  | 20.086670000 |
| H | 15.096445000 | 4.067246000  | 21.103498000 |
| H | 15.679457000 | 3.601706000  | 19.489297000 |
| H | 14.187307000 | 2.888194000  | 20.143774000 |
| C | 13.231288000 | 1.833087000  | 16.376100000 |
| C | 12.936544000 | 0.967324000  | 15.153712000 |
| H | 12.733391000 | -0.065984000 | 15.452935000 |
| H | 13.788217000 | 0.965081000  | 14.467586000 |
| H | 12.053810000 | 1.336638000  | 14.623849000 |
| C | 12.010837000 | 1.868801000  | 17.296018000 |
| H | 11.139686000 | 2.250473000  | 16.756437000 |
| H | 12.196828000 | 2.522607000  | 18.149421000 |
| H | 11.776731000 | 0.861948000  | 17.658691000 |
| C | 14.443830000 | 1.263966000  | 17.112793000 |
| H | 14.222164000 | 0.245231000  | 17.448212000 |
| H | 14.701522000 | 1.863762000  | 17.986738000 |
| H | 15.316801000 | 1.226178000  | 16.456183000 |
| C | 8.276844000  | 8.023945000  | 13.008621000 |
| C | 6.835092000  | 7.848999000  | 13.491268000 |
| H | 6.320662000  | 7.092310000  | 12.889783000 |
| H | 6.280648000  | 8.789548000  | 13.402494000 |
| H | 6.824006000  | 7.532107000  | 14.536925000 |
| C | 8.299734000  | 8.388127000  | 11.524049000 |

|   |              |              |              |
|---|--------------|--------------|--------------|
| H | 9.330028000  | 8.505772000  | 11.176930000 |
| H | 7.763167000  | 9.325955000  | 11.346927000 |
| H | 7.823148000  | 7.600917000  | 10.931338000 |
| C | 8.995471000  | 9.090407000  | 13.830067000 |
| H | 8.972531000  | 8.836663000  | 14.893009000 |
| H | 8.513898000  | 10.065462000 | 13.709818000 |
| H | 10.039131000 | 9.181636000  | 13.516156000 |
| C | 8.860555000  | 3.579212000  | 13.486549000 |
| C | 8.780080000  | 3.748571000  | 11.969603000 |
| H | 8.516419000  | 4.778153000  | 11.720526000 |
| H | 8.028327000  | 3.073484000  | 11.546101000 |
| H | 9.745616000  | 3.519410000  | 11.510653000 |
| C | 9.268213000  | 2.150498000  | 13.841366000 |
| H | 10.218279000 | 1.890181000  | 13.366042000 |
| H | 8.514560000  | 1.437547000  | 13.491507000 |
| H | 9.373632000  | 2.035778000  | 14.924292000 |
| C | 7.507881000  | 3.898145000  | 14.124828000 |
| H | 7.540384000  | 3.765426000  | 15.208913000 |
| H | 6.745969000  | 3.223147000  | 13.720785000 |
| H | 7.204041000  | 4.924541000  | 13.911392000 |
| C | 8.933225000  | 6.094702000  | 17.119751000 |
| C | 7.503198000  | 6.079063000  | 17.665097000 |
| H | 7.007822000  | 7.032811000  | 17.459141000 |
| H | 7.501235000  | 5.914290000  | 18.747424000 |
| H | 6.920746000  | 5.283075000  | 17.191964000 |
| C | 9.622953000  | 4.758715000  | 17.386513000 |
| H | 9.078183000  | 3.937279000  | 16.913301000 |
| H | 9.668773000  | 4.563381000  | 18.462688000 |
| H | 10.648606000 | 4.765364000  | 17.008462000 |
| C | 9.728847000  | 7.232667000  | 17.757974000 |
| H | 10.760983000 | 7.219784000  | 17.400414000 |
| H | 9.743902000  | 7.132533000  | 18.848469000 |
| H | 9.280874000  | 8.198808000  | 17.507206000 |
| C | 16.743292000 | 5.451097000  | 10.230703000 |
| C | 18.069376000 | 5.129609000  | 10.922768000 |
| H | 18.087006000 | 5.557080000  | 11.929256000 |
| H | 18.913728000 | 5.534779000  | 10.355322000 |
| H | 18.199961000 | 4.046561000  | 11.010479000 |
| C | 16.544805000 | 6.962903000  | 10.132221000 |
| H | 15.619461000 | 7.193774000  | 9.600962000  |
| H | 17.379882000 | 7.421315000  | 9.591336000  |
| H | 16.492857000 | 7.408630000  | 11.127480000 |
| C | 16.710773000 | 4.825207000  | 8.834614000  |
| H | 16.855102000 | 3.741712000  | 8.894232000  |
| H | 17.508029000 | 5.240014000  | 8.208229000  |
| H | 15.751257000 | 5.029180000  | 8.352218000  |
| C | 12.405657000 | 6.458347000  | 9.405879000  |
| C | 11.172303000 | 5.852042000  | 10.069434000 |
| H | 11.096784000 | 4.786565000  | 9.835080000  |
| H | 10.262437000 | 6.345236000  | 9.713838000  |
| H | 11.209712000 | 5.971088000  | 11.155423000 |
| C | 12.322805000 | 6.299985000  | 7.886001000  |
| H | 13.225356000 | 6.698370000  | 7.412507000  |
| H | 11.456634000 | 6.837620000  | 7.486766000  |
| H | 12.230799000 | 5.244266000  | 7.613423000  |
| C | 12.552648000 | 7.933369000  | 9.777968000  |

|   |              |              |              |
|---|--------------|--------------|--------------|
| H | 12.681754000 | 8.055249000  | 10.857004000 |
| H | 11.667168000 | 8.497837000  | 9.465430000  |
| H | 13.425578000 | 8.365571000  | 9.278648000  |
| C | 13.591791000 | 2.397167000  | 10.928861000 |
| C | 14.894315000 | 1.762321000  | 11.419505000 |
| H | 15.048868000 | 0.784914000  | 10.949610000 |
| H | 14.862320000 | 1.621433000  | 12.503949000 |
| H | 15.740741000 | 2.410673000  | 11.186400000 |
| C | 13.625564000 | 2.591408000  | 9.412706000  |
| H | 14.456885000 | 3.229920000  | 9.111668000  |
| H | 12.697614000 | 3.046767000  | 9.057112000  |
| H | 13.743093000 | 1.620576000  | 8.919527000  |
| C | 12.400408000 | 1.512913000  | 11.292843000 |
| H | 12.487331000 | 0.533934000  | 10.810368000 |
| H | 11.464021000 | 1.973970000  | 10.965394000 |
| H | 12.353604000 | 1.349748000  | 12.372623000 |
| C | 12.131268000 | 11.001372000 | 16.427351000 |
| C | 12.443153000 | 9.622226000  | 16.566223000 |
| H | 11.685368000 | 8.888959000  | 16.298435000 |
| C | 13.792190000 | 9.186284000  | 16.894009000 |
| H | 14.021889000 | 8.140196000  | 17.087760000 |
| C | 14.780981000 | 10.200359000 | 17.179534000 |
| C | 14.404908000 | 11.575053000 | 17.222458000 |
| H | 15.154718000 | 12.315031000 | 17.472382000 |
| C | 13.125058000 | 11.986459000 | 16.790200000 |
| H | 12.864112000 | 13.036910000 | 16.766774000 |
| C | 10.859836000 | 11.549424000 | 15.888366000 |
| C | 9.679163000  | 11.494550000 | 16.638012000 |
| H | 9.680161000  | 10.954900000 | 17.581326000 |
| C | 8.530210000  | 12.151378000 | 16.204139000 |
| H | 7.619340000  | 12.100350000 | 16.794512000 |
| C | 8.564228000  | 12.899925000 | 15.028825000 |
| H | 7.681343000  | 13.440439000 | 14.697964000 |
| C | 9.735350000  | 12.955571000 | 14.273509000 |
| H | 9.746271000  | 13.551461000 | 13.366295000 |
| C | 10.884906000 | 12.258065000 | 14.667831000 |
| C | 11.970350000 | 11.453608000 | 12.010957000 |
| H | 11.834180000 | 10.409920000 | 12.319322000 |
| C | 10.701806000 | 11.970433000 | 11.339538000 |
| H | 9.808915000  | 11.801540000 | 11.944358000 |
| H | 10.556347000 | 11.442430000 | 10.388597000 |
| H | 10.761052000 | 13.039408000 | 11.098956000 |
| C | 13.146688000 | 11.465186000 | 11.032620000 |
| H | 13.278610000 | 12.446065000 | 10.563393000 |
| H | 12.957257000 | 10.747332000 | 10.227650000 |
| H | 14.074891000 | 11.169963000 | 11.526582000 |
| C | 12.730119000 | 14.068991000 | 13.312000000 |
| H | 11.935003000 | 14.336931000 | 12.603169000 |
| C | 12.580141000 | 14.937752000 | 14.562460000 |
| H | 11.614850000 | 14.805072000 | 15.056643000 |
| H | 12.677555000 | 15.996311000 | 14.292003000 |
| H | 13.369558000 | 14.716073000 | 15.288473000 |
| C | 14.087043000 | 14.346875000 | 12.661720000 |
| H | 14.898330000 | 14.080243000 | 13.345488000 |
| H | 14.180543000 | 15.416475000 | 12.436190000 |
| H | 14.240468000 | 13.796572000 | 11.732847000 |

|   |              |              |              |
|---|--------------|--------------|--------------|
| C | 16.217296000 | 9.889366000  | 17.401457000 |
| C | 16.662843000 | 9.329155000  | 18.602263000 |
| H | 15.937899000 | 9.095343000  | 19.376604000 |
| C | 18.018460000 | 9.078923000  | 18.808860000 |
| H | 18.352884000 | 8.640243000  | 19.745019000 |
| C | 18.940728000 | 9.393427000  | 17.812583000 |
| H | 19.998247000 | 9.193619000  | 17.963485000 |
| C | 18.506807000 | 9.960292000  | 16.614962000 |
| H | 19.237515000 | 10.177870000 | 15.842180000 |
| C | 17.147413000 | 10.217910000 | 16.393309000 |
| C | 17.433585000 | 9.881770000  | 13.510419000 |
| H | 18.491414000 | 10.082448000 | 13.718123000 |
| C | 17.185241000 | 8.388614000  | 13.680302000 |
| H | 17.379144000 | 8.056486000  | 14.702489000 |
| H | 17.838215000 | 7.815651000  | 13.012534000 |
| H | 16.146371000 | 8.152428000  | 13.422699000 |
| C | 17.103350000 | 10.346946000 | 12.092949000 |
| H | 16.045576000 | 10.172377000 | 11.874961000 |
| H | 17.695290000 | 9.782661000  | 11.362985000 |
| H | 17.318274000 | 11.408820000 | 11.936621000 |
| C | 17.207867000 | 12.603006000 | 14.561875000 |
| H | 16.802494000 | 12.890322000 | 13.582467000 |
| C | 16.680784000 | 13.594898000 | 15.595614000 |
| H | 15.588410000 | 13.594990000 | 15.631607000 |
| H | 17.016915000 | 14.609498000 | 15.350209000 |
| H | 17.058842000 | 13.358024000 | 16.596837000 |
| C | 18.733789000 | 12.679474000 | 14.493797000 |
| H | 19.189694000 | 12.410746000 | 15.451832000 |
| H | 19.038345000 | 13.709543000 | 14.270845000 |
| H | 19.164071000 | 12.043467000 | 13.715448000 |

#### Sextet

|    |              |              |              |
|----|--------------|--------------|--------------|
| U  | 13.271022000 | 7.124100000  | 14.246696000 |
| Mo | 13.935046000 | 10.856655000 | 15.628639000 |
| P  | 12.727015000 | 12.115498000 | 13.715185000 |
| P  | 16.494950000 | 11.150479000 | 15.493870000 |
| Si | 14.512448000 | 4.145821000  | 16.265674000 |
| Si | 9.660593000  | 5.875858000  | 14.465981000 |
| Si | 13.731964000 | 5.196924000  | 10.979681000 |
| Na | 12.285300000 | 4.065122000  | 13.746105000 |
| O  | 14.314970000 | 5.393050000  | 15.244269000 |
| O  | 16.092355000 | 3.642606000  | 16.478736000 |
| O  | 13.928081000 | 4.365632000  | 17.813792000 |
| O  | 13.537656000 | 2.906217000  | 15.615603000 |
| O  | 11.211332000 | 6.320328000  | 14.668695000 |
| O  | 8.841764000  | 6.572646000  | 13.190278000 |
| O  | 9.775489000  | 4.229810000  | 14.043274000 |
| O  | 8.683395000  | 6.127684000  | 15.798360000 |
| O  | 13.254508000 | 6.148328000  | 12.204416000 |
| O  | 15.377614000 | 4.977263000  | 10.805859000 |
| O  | 13.199574000 | 5.673478000  | 9.466832000  |
| O  | 13.139970000 | 3.654818000  | 11.401140000 |
| N  | 13.867563000 | 9.232744000  | 14.694186000 |
| C  | 17.184885000 | 3.524493000  | 15.554219000 |
| C  | 16.715319000 | 2.931193000  | 14.227508000 |
| H  | 17.563519000 | 2.787247000  | 13.550415000 |



|   |              |              |              |
|---|--------------|--------------|--------------|
| H | 16.001700000 | 3.596138000  | 13.733205000 |
| H | 16.237228000 | 1.960685000  | 14.388159000 |
| C | 18.195054000 | 2.594658000  | 16.229118000 |
| H | 17.757232000 | 1.606161000  | 16.397585000 |
| H | 18.498427000 | 3.003207000  | 17.197801000 |
| H | 19.088750000 | 2.476175000  | 15.607807000 |
| C | 17.796980000 | 4.906762000  | 15.332578000 |
| H | 18.651936000 | 4.848944000  | 14.650212000 |
| H | 18.144079000 | 5.328961000  | 16.280826000 |
| H | 17.050623000 | 5.580340000  | 14.905465000 |
| C | 14.516868000 | 5.053283000  | 18.931483000 |
| C | 13.342764000 | 5.576592000  | 19.759718000 |
| H | 13.698224000 | 6.079982000  | 20.664812000 |
| H | 12.690008000 | 4.750196000  | 20.057547000 |
| H | 12.749624000 | 6.286699000  | 19.175974000 |
| C | 15.400189000 | 6.212366000  | 18.469377000 |
| H | 14.840283000 | 6.889942000  | 17.818503000 |
| H | 16.263812000 | 5.841437000  | 17.911688000 |
| H | 15.766772000 | 6.783473000  | 19.328435000 |
| C | 15.336749000 | 4.045937000  | 19.740851000 |
| H | 15.778793000 | 4.521984000  | 20.622895000 |
| H | 16.140092000 | 3.635824000  | 19.123585000 |
| H | 14.699951000 | 3.222543000  | 20.080361000 |
| C | 13.213815000 | 1.636518000  | 16.238182000 |
| C | 12.880357000 | 0.679407000  | 15.094882000 |
| H | 12.611596000 | -0.307748000 | 15.484635000 |
| H | 13.737078000 | 0.563329000  | 14.424575000 |
| H | 12.028207000 | 1.048571000  | 14.515894000 |
| C | 11.996868000 | 1.831161000  | 17.142131000 |
| H | 11.150115000 | 2.213837000  | 16.565459000 |
| H | 12.228234000 | 2.548546000  | 17.932077000 |
| H | 11.699797000 | 0.880546000  | 17.598702000 |
| C | 14.386690000 | 1.077418000  | 17.044423000 |
| H | 14.106374000 | 0.108046000  | 17.470045000 |
| H | 14.657200000 | 1.746042000  | 17.863938000 |
| H | 15.267448000 | 0.934603000  | 16.413778000 |
| C | 8.178687000  | 7.847399000  | 13.100936000 |
| C | 6.747549000  | 7.695384000  | 13.620803000 |
| H | 6.209435000  | 6.940658000  | 13.037985000 |
| H | 6.203675000  | 8.642488000  | 13.536866000 |
| H | 6.758148000  | 7.386153000  | 14.668649000 |
| C | 8.169147000  | 8.202490000  | 11.613792000 |
| H | 9.191606000  | 8.295447000  | 11.237180000 |
| H | 7.648004000  | 9.150503000  | 11.444830000 |
| H | 7.661032000  | 7.421786000  | 11.039253000 |
| C | 8.931140000  | 8.912934000  | 13.895420000 |
| H | 8.939582000  | 8.667690000  | 14.960628000 |
| H | 8.458523000  | 9.892809000  | 13.777810000 |
| H | 9.966634000  | 8.990895000  | 13.551251000 |
| C | 8.708150000  | 3.375979000  | 13.559082000 |
| C | 8.585880000  | 3.557240000  | 12.046246000 |
| H | 8.323093000  | 4.590667000  | 11.812322000 |
| H | 7.818228000  | 2.890592000  | 11.638211000 |
| H | 9.536877000  | 3.325035000  | 11.558501000 |
| C | 9.127450000  | 1.944946000  | 13.891580000 |
| H | 10.065896000 | 1.688508000  | 13.390072000 |

|   |              |             |              |
|---|--------------|-------------|--------------|
| H | 8.366742000  | 1.232919000 | 13.555516000 |
| H | 9.261600000  | 1.822118000 | 14.970285000 |
| C | 7.377563000  | 3.691591000 | 14.242985000 |
| H | 7.453640000  | 3.572153000 | 15.326669000 |
| H | 6.604760000  | 3.008837000 | 13.874138000 |
| H | 7.059680000  | 4.714586000 | 14.031662000 |
| C | 8.955873000  | 6.019073000 | 17.204526000 |
| C | 7.585750000  | 5.987877000 | 17.884291000 |
| H | 7.017497000  | 6.889631000 | 17.636636000 |
| H | 7.693212000  | 5.934431000 | 18.972514000 |
| H | 7.010861000  | 5.119161000 | 17.549491000 |
| C | 9.733056000  | 4.740607000 | 17.510357000 |
| H | 9.184433000  | 3.862650000 | 17.156871000 |
| H | 9.887906000  | 4.634914000 | 18.589040000 |
| H | 10.715564000 | 4.758001000 | 17.031006000 |
| C | 9.747844000  | 7.246079000 | 17.657366000 |
| H | 10.706380000 | 7.283265000 | 17.132394000 |
| H | 9.939022000  | 7.211092000 | 18.735099000 |
| H | 9.191223000  | 8.162634000 | 17.437693000 |
| C | 16.367980000 | 5.804963000 | 10.172695000 |
| C | 17.690416000 | 5.465052000 | 10.861147000 |
| H | 17.636882000 | 5.706343000 | 11.926602000 |
| H | 18.516801000 | 6.028949000 | 10.415916000 |
| H | 17.908101000 | 4.397300000 | 10.761605000 |
| C | 16.045710000 | 7.288395000 | 10.352626000 |
| H | 15.098845000 | 7.539147000 | 9.866699000  |
| H | 16.831593000 | 7.906520000 | 9.905572000  |
| H | 15.971469000 | 7.542119000 | 11.413922000 |
| C | 16.430708000 | 5.444507000 | 8.686553000  |
| H | 16.668888000 | 4.382890000 | 8.564162000  |
| H | 17.204799000 | 6.028693000 | 8.177088000  |
| H | 15.468275000 | 5.643545000 | 8.208847000  |
| C | 11.945891000 | 6.232071000 | 9.045187000  |
| C | 10.773770000 | 5.529095000 | 9.727654000  |
| H | 10.798206000 | 4.454330000 | 9.526055000  |
| H | 9.822320000  | 5.923822000 | 9.356736000  |
| H | 10.801095000 | 5.684700000 | 10.809654000 |
| C | 11.889706000 | 6.018618000 | 7.531069000  |
| H | 12.748053000 | 6.495177000 | 7.047771000  |
| H | 10.973771000 | 6.447388000 | 7.111546000  |
| H | 11.913082000 | 4.951354000 | 7.291365000  |
| C | 11.933963000 | 7.725772000 | 9.370706000  |
| H | 12.022334000 | 7.873001000 | 10.450334000 |
| H | 11.004410000 | 8.191127000 | 9.025446000  |
| H | 12.772188000 | 8.228424000 | 8.877652000  |
| C | 13.423125000 | 2.396855000 | 10.738532000 |
| C | 14.724870000 | 1.827664000 | 11.301769000 |
| H | 14.944621000 | 0.852534000 | 10.853457000 |
| H | 14.647973000 | 1.698639000 | 12.384945000 |
| H | 15.551954000 | 2.509723000 | 11.095009000 |
| C | 13.531210000 | 2.561378000 | 9.221897000  |
| H | 14.355651000 | 3.225014000 | 8.953522000  |
| H | 12.610033000 | 2.973462000 | 8.803157000  |
| H | 13.712966000 | 1.584444000 | 8.761442000  |
| C | 12.250357000 | 1.474413000 | 11.068542000 |
| H | 12.392361000 | 0.490398000 | 10.610134000 |

|   |              |              |              |
|---|--------------|--------------|--------------|
| H | 11.311475000 | 1.894827000  | 10.696273000 |
| H | 12.164804000 | 1.326940000  | 12.149624000 |
| C | 12.057235000 | 11.595191000 | 16.586800000 |
| C | 12.295496000 | 10.287269000 | 17.112961000 |
| H | 11.575970000 | 9.496607000  | 16.930830000 |
| C | 13.553339000 | 9.977418000  | 17.707866000 |
| H | 13.784761000 | 8.954502000  | 17.983120000 |
| C | 14.570285000 | 10.983396000 | 17.787116000 |
| C | 14.205203000 | 12.354090000 | 17.533106000 |
| H | 14.921456000 | 13.139672000 | 17.740484000 |
| C | 12.974501000 | 12.658042000 | 16.940062000 |
| H | 12.728730000 | 13.682035000 | 16.681707000 |
| C | 10.854595000 | 11.982742000 | 15.804926000 |
| C | 9.596069000  | 12.070973000 | 16.409342000 |
| H | 9.488191000  | 11.771095000 | 17.448463000 |
| C | 8.501162000  | 12.563337000 | 15.701986000 |
| H | 7.527513000  | 12.623791000 | 16.180738000 |
| C | 8.667649000  | 13.006334000 | 14.391183000 |
| H | 7.826061000  | 13.419844000 | 13.841771000 |
| C | 9.918770000  | 12.918678000 | 13.780508000 |
| H | 10.031313000 | 13.283193000 | 12.764746000 |
| C | 11.016179000 | 12.374124000 | 14.459338000 |
| C | 12.402640000 | 11.038833000 | 12.172716000 |
| H | 11.881391000 | 10.187207000 | 12.629508000 |
| C | 11.532541000 | 11.620332000 | 11.060312000 |
| H | 10.518225000 | 11.850768000 | 11.392233000 |
| H | 11.446327000 | 10.886403000 | 10.249898000 |
| H | 11.969543000 | 12.524844000 | 10.621856000 |
| C | 13.729707000 | 10.513933000 | 11.620937000 |
| H | 14.316769000 | 11.299598000 | 11.135512000 |
| H | 13.534864000 | 9.743062000  | 10.867625000 |
| H | 14.317030000 | 10.066313000 | 12.426526000 |
| C | 13.024910000 | 13.861828000 | 13.001028000 |
| H | 12.208605000 | 14.020663000 | 12.284564000 |
| C | 12.928004000 | 14.947518000 | 14.072500000 |
| H | 11.970569000 | 14.924084000 | 14.599914000 |
| H | 13.028628000 | 15.935742000 | 13.607468000 |
| H | 13.729788000 | 14.852207000 | 14.811010000 |
| C | 14.355497000 | 13.957872000 | 12.255113000 |
| H | 15.188718000 | 13.665737000 | 12.902520000 |
| H | 14.530921000 | 14.990626000 | 11.929754000 |
| H | 14.384260000 | 13.324632000 | 11.365640000 |
| C | 15.967516000 | 10.709497000 | 18.215523000 |
| C | 16.264714000 | 10.367363000 | 19.538183000 |
| H | 15.453209000 | 10.285459000 | 20.256621000 |
| C | 17.581466000 | 10.137133000 | 19.934210000 |
| H | 17.799624000 | 9.865498000  | 20.963535000 |
| C | 18.613744000 | 10.257054000 | 19.006472000 |
| H | 19.642095000 | 10.071939000 | 19.305191000 |
| C | 18.327303000 | 10.602968000 | 17.686082000 |
| H | 19.142282000 | 10.663882000 | 16.971738000 |
| C | 17.009155000 | 10.831095000 | 17.270762000 |
| C | 17.634308000 | 9.959655000  | 14.551694000 |
| H | 18.658042000 | 10.169956000 | 14.884825000 |
| C | 17.293064000 | 8.514783000  | 14.897844000 |
| H | 17.401790000 | 8.312752000  | 15.967052000 |

|   |              |              |              |
|---|--------------|--------------|--------------|
| H | 17.960191000 | 7.834455000  | 14.355949000 |
| H | 16.257517000 | 8.295070000  | 14.616172000 |
| C | 17.545623000 | 10.209350000 | 13.046365000 |
| H | 16.516507000 | 10.095239000 | 12.694686000 |
| H | 18.165159000 | 9.480649000  | 12.510324000 |
| H | 17.895486000 | 11.206672000 | 12.761972000 |
| C | 17.298601000 | 12.827739000 | 15.038674000 |
| H | 17.049355000 | 12.900939000 | 13.971439000 |
| C | 16.623275000 | 13.992700000 | 15.754714000 |
| H | 15.537076000 | 13.945277000 | 15.646204000 |
| H | 16.973451000 | 14.946122000 | 15.341380000 |
| H | 16.863336000 | 13.990492000 | 16.823998000 |
| C | 18.817155000 | 12.922972000 | 15.190318000 |
| H | 19.115836000 | 12.862687000 | 16.241879000 |
| H | 19.163658000 | 13.892492000 | 14.811478000 |
| H | 19.355314000 | 12.149814000 | 14.634773000 |

## References

1. V. Mougel, C. Camp, J. Pécaut, C. Copéret, L. Maron, C. E. Kefalidis, M. Mazzanti, *Angew. Chem. Int. Ed.* 2012, **51**, 12280
2. Buss, Joshua Alan, Molybdenum Para-Terphenyl Diphosphine Complexes, Doctoral dissertation, Caltech, 2018
3. J. A. Buss, C. Cheng, T. Agapie, *Angew. Chem. Int. Ed.* 2018, **57**, 9670-9674
4. CrysAlis<sup>Pro</sup> Software System, Rigaku Oxford diffraction 2021, V1.171.41.99a.
5. Sheldrick, G.M., Crystal structure refinement with ShelXL, *Acta Cryst.* 2015, **C71**, 3-8.
6. Sheldrick, G.M., ShelXT-Integrated space-group and crystal-structure determination, *Acta Cryst.* 2015, **A71**, 3-8.
- 8.(a) N. Cox, A. Nalepa, M.-E. Pandelia, W. Lubitz, A. Savitsky, *Meth. Enzymol.* 2015, **563**, 211 – 249;  
(b) D. Goldfarb, S. Stoll, *EPR spectroscopy: fundamentals and methods*, eMagRes Books and Wiley, New York, N. Y., 2018.
8. (a) A. D. Becke, *J. Chem. Phys.* 1993, **98**, 5648; (b) K. Burke, J. P. Perdew, W. Yang, In *Electronic Density Functional Theory: Recent Progress and New Directions*, Eds: J. F. Dobson, G. Vignale, M. P. Das, Plenum, New York, 1998
9. (a) A. Moritz, X. Cao and M. Dolg, *Theor. Chem. Acc.* 2007, **118**, 845; (b) A. Hollwarth, M. Bohme, S. Dapprich, A.W. Ehlers, A. Gobbi, V. Jonas, K.F. Kohler, R. Stegmann, A. Veldkamp, G. Frenking *J. Chem. Phys.* 1993, **208**, 237.
10. (a) P. C. Hariharan and J. A. Pople, *Theor. Chim. Acta* **1973**, **28**, 213; (b) W. J. Hehre, R. Ditchfield and J. A. Pople, *J. Chem. Phys.* 1972, **56**, 2257.
11. Gaussian 16, Revision B.01, M. J. Frisch, G. W. Trucks, H. B. Schlegel, G. E. Scuseria, M. A. Robb, J. R. Cheeseman, G. Scalmani, V. Barone, G. A. Petersson, H. Nakatsuji, X. Li, M. Caricato, A. V. Marenich, J. Bloino, B. G. Janesko, R. Gomperts, B. Mennucci, H. P. Hratchian, J. V. Ortiz, A. F. Izmaylov, J. L. Sonnenberg, D. Williams-Young, F. Ding, F. Lipparini, F. Egidi, J. Goings, B. Peng, A. Petrone, T. Henderson, D. Ranasinghe, V. G. Zakrzewski, J. Gao, N. Rega, G. Zheng, W. Liang, M. Hada, M. Ehara, K. Toyota, R. Fukuda, J. Hasegawa, M. Ishida, T. Nakajima, Y. Honda, O. Kitao, H. Nakai, T. Vreven, K. Throssell, J. A. Montgomery, Jr., J. E. Peralta, F. Ogliaro, M. J. Bearpark, J. J. Heyd, E. N. Brothers, K. N. Kudin, V. N. Staroverov, T. A. Keith, R. Kobayashi, J. Normand, K. Raghavachari, A. P. Rendell, J. C. Burant, S. S. Iyengar, J. Tomasi, M. Cossi, J. M. Millam, M. Klene, C. Adamo, R. Cammi, J. W. Ochterski, R. L. Martin, K. Morokuma, O. Farkas, J. B. Foresman, and D. J. Fox, Gaussian, Inc., Wallingford CT, 2016.
